# Supplementary material for: Direct C-4 alkylation of quinazoline N-oxides with ethers via an oxidative cross-coupling reaction under metal-free conditions
Source: Royal Society of Chemistry journal article supplement (doi:10.1039/c8ob01429a), 2018-01-01

Direct C-4 Alkylation of Quinazoline N-Oxides with Ethers via Oxidative Cross-Coupling Reaction under Transition-Metal-free Conditions

Qin Yang, Minhao Lou, Zhijian Yin, Zhihong Deng, Qiuping Ding, \*Yiyuan Peng\*

<sup>a</sup>Key Laboratory of Small Functional Organic Molecule, Ministry of Education and Key Laboratory of Green Chemistry, Jiangxi Province, Nanchang, Jiangxi 330022, China

**Supporting Information**

|                                                                                  |    |
|----------------------------------------------------------------------------------|----|
| General experimental methods: .....                                              | 2  |
| General experimental procedure: .....                                            | 2  |
| The reactions of quinazoline-3-oxide and 1,4-dioxane in various of solvents..... | 2  |
| The KIE studies on ethers:.....                                                  | 3  |
| Characterization data for the cross-coupled products: .....                      | 4  |
| <sup>1</sup> H and <sup>13</sup> C NMR spectra of compounds .....                | 13 |
| <sup>1</sup> H of spectra of benzoic acid concomitancy with <b>3q</b> .....      | 39 |

## General experimental methods:

Unless otherwise stated, all commercial reagents were used as received. All solvents were dried and distilled according to standard procedures. Flash column chromatography was performed using silica gel (60-Å pore size, 32-63µm, standard grade). Analytical thin-layer chromatography was performed using glass plates pre-coated with 0.25 mm 230-400 mesh silica gel impregnated with a fluorescent indicator (254 nm). Thin layer chromatography plates were visualized by exposure to ultraviolet light. Organic solutions were concentrated on rotary evaporators at ~20 Torr at 25-35°C. Nuclear magnetic resonance (NMR) spectra are recorded in parts per million from internal tetramethylsilane on the  $\delta$  scale.  $^1\text{H}$  and  $^{13}\text{C}$  NMR spectra were recorded in  $\text{CDCl}_3$  on a Bruker DRX-400 spectrometer operating at 400 MHz and 100 MHz, respectively. All chemical shift values are quoted in ppm and coupling constants quoted in Hz. High resolution mass spectrometry (HRMS) spectra were obtained on a microTOF II Instrument.

## General experimental procedure

A Schlenk tube was charged with quinazoline 3-oxide **1** (0.20 mmol) and *t*-butyl peroxybenzoate (TBPB, 0.2 mmol, 1.0 equiv.) under  $\text{N}_2$ . Then 1,4-dioxane **2a** (1.0 mL) was injected into the bottom of the tube using a long needle syringe. The mixture was stirred at 100 °C for 4.5 h. After completion of the reaction (monitored by TLC),  $\text{Et}_3\text{N}$  (2.0 mL) was added to remove the benzoic acid. Then, the mixture was concentrated in vacuum and the residue was purified by flash column chromatography on silica gel with petroleum ether-ethyl acetate as eluent to give the desired product.

## The reactions of quinazoline-3-oxide and 1,4-dioxane in various of solvents

Screening of the solvents revealed that the reaction could be performed at a loading of 10 equivalents **2a** in PhCl (entry 2), but the yield was lowered to 25%.

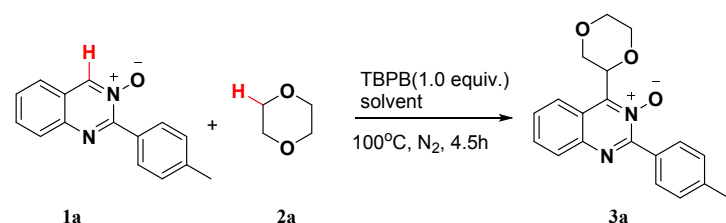

| Entry <sup>a</sup> | solvent | T/°C | Time/h | Yield/% <sup>b</sup> |
|--------------------|---------|------|--------|----------------------|
| 1                  | toluene | 100  | 4.5    | 16                   |
| 2                  | PhCl    | 100  | 4.5    | 25                   |
| 3                  | THF     | 100  | 4.5    | 6                    |
| 4                  | DCE     | 100  | 4.5    | trace                |
| 5                  | EA      | 100  | 4.5    | 15                   |

<sup>a</sup> Reaction conditions: **1a** (0.2 mmol), **2a** (10.0 equiv), solvent 1.0mL, under  $\text{N}_2$ , sealed tube. <sup>b</sup> Isolated yield.

## The KIE studies on ethers:

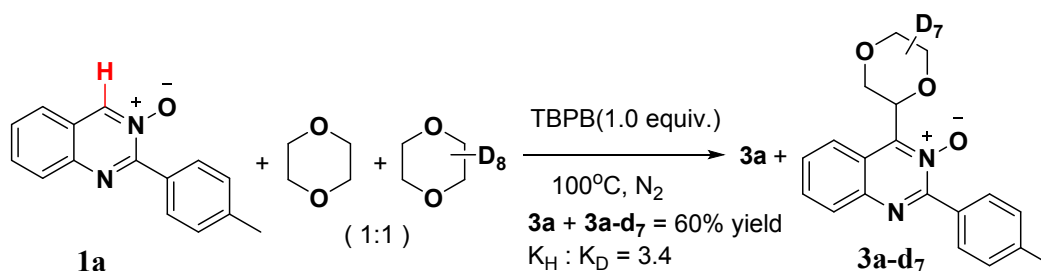

In a Schlenk tube, the mixture of **1a** (0.2 mmol), 1,4-dioxane and 1,4-dioxane-d<sub>8</sub> (1:1, 1.0 mL) was treated by standard condition for 4.5 h. After completion of the reaction, Et<sub>3</sub>N (2.0 mL) was added to remove the benzoic acid. Then, the mixture was concentrated in vacuum and the residue was purified by flash column chromatography on silica gel with petroleum ether-ethyl acetate as eluent to give product **3a** and **3a-d<sub>7</sub>**. The mixture was analyzed using <sup>1</sup>H NMR spectrometer. The data analysis method is explained as follows:

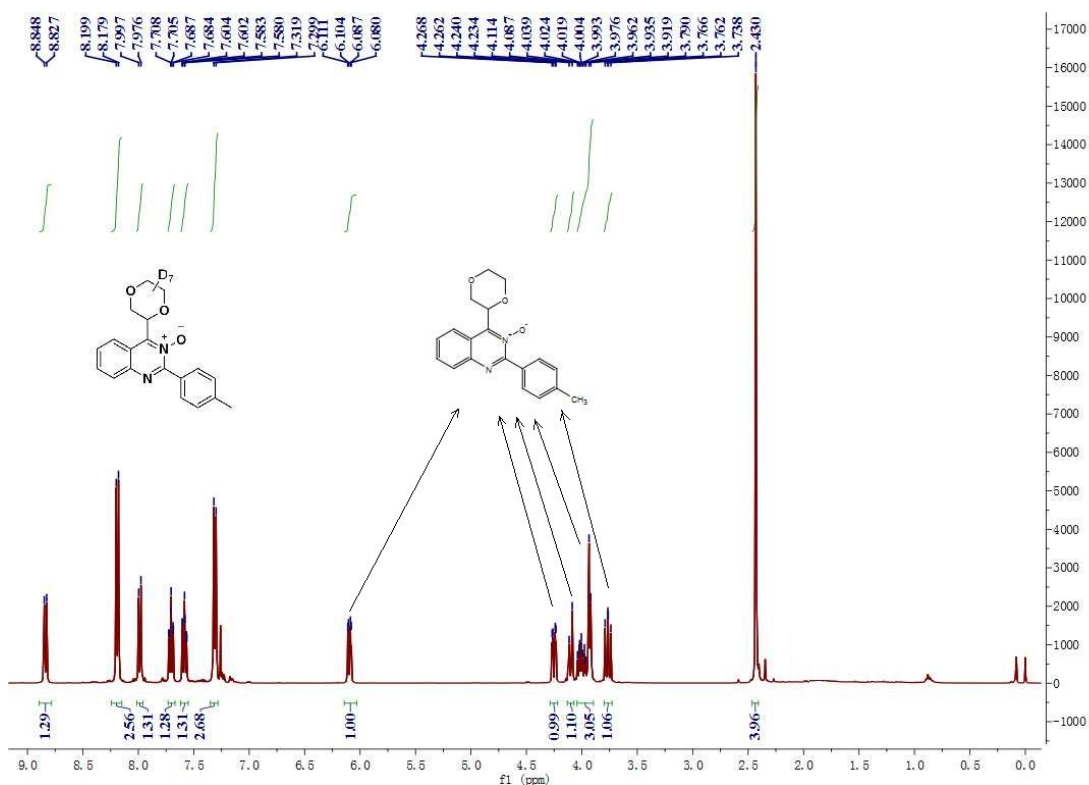

The 1,4-dioxane part of **3a-d<sub>7</sub>** are silent on <sup>1</sup>H NMR while that of **3a** are responding. So the ether proton adjacent to quinazoline skeleton was integrated as 1.00. Both **3a** and **3a-d<sub>7</sub>** have signal in the region of 7.28–8.85 ppm. The ratio of **3a** / **3a-d<sub>7</sub>** was calculated to be  $1/(1.29-1) = 1/0.29 = 3.4$ .

**Characterization data for the cross-coupled products:**

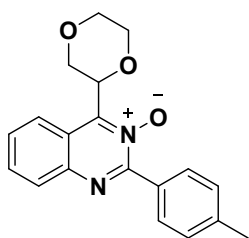

**4-(1,4-dioxan-2-yl)-2-(p-tolyl)quinazoline 3-oxide (3a).** Compound was obtained as a faint yellow solid: yield 76%;  $^1\text{H}$  NMR (400 MHz,  $\text{CDCl}_3$ )  $\delta$  8.84 (d,  $J = 8.8$  Hz, 1H), 8.18 (d,  $J = 8.4$  Hz, 2H), 7.99 (d,  $J = 8.0$  Hz, 1H), 7.77 – 7.67 (m, 1H), 7.62 – 7.55 (m, 1H), 7.31 (d,  $J = 8.4$  Hz, 2H), 6.10 (dd,  $J = 9.6, 2.8$  Hz, 1H), 4.25 (dd,  $J = 11.2, 2.4$  Hz, 1H), 4.10 (d,  $J = 10.8$  Hz, 1H), 4.05 – 3.90 (m, 3H), 3.77 (t,  $J = 10.8$ , 1H), 2.43 (s, 3H).  $^{13}\text{C}$  NMR (101 MHz,  $\text{CDCl}_3$ )  $\delta$  154.3, 149.8, 141.3, 140.9, 131.1, 130.3, 130.0, 129.3, 129.1, 128.7, 128.5, 128.3, 124.3, 122.8, 75.2, 67.6, 67.0, 66.6, 21.6. HRMS (ESI):  $m/z$   $[\text{M} + \text{H}]^+$  calcd for  $\text{C}_{19}\text{H}_{18}\text{N}_2\text{O}_3$ : 323.1396, found 323.1397.

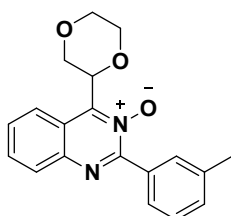

**4-(1,4-dioxan-2-yl)-2-(m-tolyl)quinazoline 3-oxide (3b).** Compound was obtained as a faint yellow solid: yield 78%;  $^1\text{H}$  NMR (400 MHz,  $\text{CDCl}_3$ )  $\delta$  8.86 (d,  $J = 8.4$  Hz, 1H), 8.10 – 7.95 (m, 3H), 7.76–7.69 (m, 1H), 7.64–7.56 (m, 1H), 7.40 (t,  $J = 7.6$  Hz, 1H), 7.34 (d,  $J = 7.6$  Hz, 1H), 6.10 (dd,  $J = 9.6, 2.6$  Hz, 1H), 4.26 (dd,  $J = 11.2, 2.4$  Hz, 1H), 4.11 (d,  $J = 11.2$  Hz, 1H), 4.07 – 3.88 (m, 3H), 3.77 (t,  $J = 10.0$ , 1H), 2.45 (s, 3H).  $^{13}\text{C}$  NMR (101 MHz,  $\text{CDCl}_3$ )  $\delta$  154.5, 149.8, 140.9, 137.7, 132.1, 131.7, 131.2, 130.7, 129.1, 128.7, 127.9, 127.4, 124.3, 123.0, 75.2, 67.6, 67.0, 66.6, 21.5. HRMS (ESI):  $m/z$   $[\text{M} + \text{H}]^+$  calcd for  $\text{C}_{19}\text{H}_{18}\text{N}_2\text{O}_3$ : 323.1396, found 323.1394.

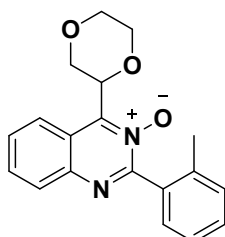

**4-(1,4-dioxan-2-yl)-2-(o-tolyl)quinazoline 3-oxide (3c).** Compound was obtained as a white solid: yield 71%;  $^1\text{H}$  NMR (400 MHz,  $\text{CDCl}_3$ )  $\delta$  8.90 (d,  $J = 8.4$  Hz, 1H), 8.01 (d,  $J = 8.4$  Hz, 1H), 7.75 (t,  $J = 7.6$  Hz, 1H), 7.66 (t,  $J = 7.8$  Hz, 1H), 7.49 (d,  $J = 7.2$  Hz, 1H), 7.42 (t,  $J = 7.4$  Hz, 1H), 7.33 (t,  $J = 7.2$  Hz, 2H), 6.06 (dd,  $J = 9.6, 2.4$  Hz, 1H), 4.24 (dd,  $J = 11.2, 2.0$  Hz, 1H), 4.11 (d,  $J = 11.2$  Hz, 1H), 4.06 – 3.89 (m, 3H), 3.79 (t,  $J = 10.4$  Hz, 1H), 2.27 (s, 3H).  $^{13}\text{C}$  NMR (101 MHz,  $\text{CDCl}_3$ )  $\delta$  156.5, 149.2, 140.4, 137.4, 132.8, 131.2, 130.3, 130.0, 129.2, 129.1, 129.0, 125.9, 124.3, 123.2, 75.0, 67.6, 67.0, 66.6, 19.5. HRMS (ESI):  $m/z$   $[\text{M} + \text{H}]^+$  calcd for  $\text{C}_{19}\text{H}_{18}\text{N}_2\text{O}_3$ : 323.1396, found 323.1397.

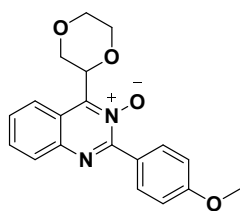

**4-(1,4-dioxan-2-yl)-2-(4-methoxyphenyl)quinazoline 3-oxide (3d).** Compound was obtained as a faint yellow solid: yield 75%;  $^1\text{H}$  NMR (400 MHz,  $\text{CDCl}_3$ )  $\delta$  8.85 (d,  $J = 8.8$  Hz, 1H), 8.37 (d,  $J = 8.8$  Hz, 2H), 7.99 (d,  $J = 8.4$  Hz, 1H), 7.72 (t,  $J = 7.6$  Hz, 1H), 7.59 (t,  $J = 7.8$  Hz, 1H), 7.02 (d,  $J = 8.8$  Hz, 2H), 6.11 (dd,  $J = 9.6$ , 2.4 Hz, 1H), 4.27 (dd,  $J = 11.2$ , 2.4 Hz, 1H), 4.11 (d,  $J = 11.2$  Hz, 1H), 4.02-3.96 (m, 3H), 3.89 (s, 3H), 3.77 (t,  $J = 10.4$  Hz, 1H).  $^{13}\text{C}$  NMR (101 MHz,  $\text{CDCl}_3$ )  $\delta$  161.8, 153.7, 150.0, 141.1, 132.4, 131.3, 129.0, 128.3, 124.4, 124.3, 122.6, 113.4, 75.2, 67.6, 67.1, 66.6, 55.5. HRMS (ESI):  $m/z$   $[\text{M} + \text{H}]^+$  calcd for  $\text{C}_{19}\text{H}_{18}\text{N}_2\text{O}_4$ : 339.1345, found 339.1347.

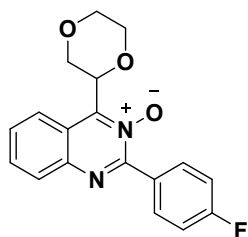

**4-(1,4-dioxan-2-yl)-2-(4-fluorophenyl)quinazoline 3-oxide (3e).** Compound was obtained as a faint yellow solid: yield 78%;  $^1\text{H}$  NMR (400 MHz,  $\text{CDCl}_3$ )  $\delta$  8.86 (d,  $J = 8.8$  Hz, 1H), 8.36 (dd,  $J = 8.8$ , 5.6 Hz, 2H), 8.00 (d,  $J = 8.4$  Hz, 1H), 7.74 (t,  $J = 7.6$  Hz, 1H), 7.62 (t,  $J = 7.8$  Hz, 1H), 7.19 (t,  $J = 8.6$  Hz, 2H), 6.09 (dd,  $J = 9.6$ , 2.6 Hz, 1H), 4.25 (dd,  $J = 11.2$ , 2.6 Hz, 1H), 4.12 (d,  $J = 11.2$  Hz, 1H), 4.06 – 3.91 (m, 3H), 3.77 (t,  $J = 10.6$  Hz, 1H).  $^{13}\text{C}$  NMR (101 MHz,  $\text{CDCl}_3$ )  $\delta$  164.3 (d,  $J = 250.6$  Hz), 153.1, 150.1, 140.9, 132.9 (d,  $J = 8.7$  Hz), 131.4, 129.1, 128.8, 128.2 (d,  $J = 3.4$  Hz), 124.4, 122.9, 115.1 (d,  $J = 21.7$  Hz), 75.1, 67.6, 67.0, 66.6. HRMS (ESI):  $m/z$   $[\text{M} + \text{H}]^+$  calcd for  $\text{C}_{18}\text{H}_{15}\text{FN}_2\text{O}_3$ : 327.1145, found 327.1146.

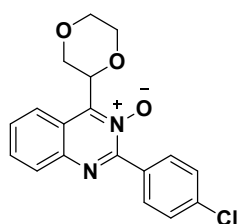

**2-(4-chlorophenyl)-4-(1,4-dioxan-2-yl)quinazoline 3-oxide (3f).** Compound was obtained as a yellow solid: yield 70%;  $^1\text{H}$  NMR (400 MHz,  $\text{CDCl}_3$ )  $\delta$  8.86 (d,  $J = 8.4$  Hz, 1H), 8.30 (d,  $J = 8.8$  Hz, 2H), 7.99 (d,  $J = 8.4$  Hz, 1H), 7.73 (t,  $J = 7.6$  Hz, 1H), 7.62 (t,  $J = 7.6$  Hz, 1H), 7.47 (d,  $J = 8.8$  Hz, 2H), 6.08 (dd,  $J = 9.6$ , 2.4 Hz, 1H), 4.24 (dd,  $J = 11.1$ , 2.4 Hz, 1H), 4.11 (d,  $J = 11.2$  Hz, 1H), 4.05 – 3.90 (m, 3H), 3.76 (t,  $J = 10.4$ , 1H).  $^{13}\text{C}$  NMR (101 MHz,  $\text{CDCl}_3$ )  $\delta$  153.0, 150.0, 140.8, 137.1, 131.9, 131.3, 130.6, 129.1, 128.9, 128.2, 124.3, 123.0, 75.1, 67.6, 67.0, 66.6. HRMS (ESI):  $m/z$   $[\text{M} + \text{H}]^+$  calcd for  $\text{C}_{18}\text{H}_{15}\text{ClN}_2\text{O}_3$ : 343.0849, found 343.0850.

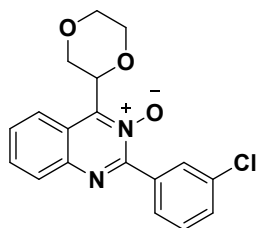

**2-(3-chlorophenyl)-4-(1,4-dioxan-2-yl)quinazoline 3-oxide (3g).** Compound was obtained as a faint yellow solid: yield 70%;  $^1\text{H}$  NMR (400 MHz,  $\text{CDCl}_3$ )  $\delta$  8.87 (d,  $J$  = 8.4 Hz, 1H), 8.31 (s, 1H), 8.20 (d,  $J$  = 7.6 Hz, 1H), 8.01 (d,  $J$  = 8.4 Hz, 1H), 7.75 (t,  $J$  = 7.8 Hz, 1H), 7.64 (t,  $J$  = 7.8 Hz, 1H), 7.54-7.48 (m, 1H), 7.44 (t,  $J$  = 7.8 Hz, 1H), 6.08 (dd,  $J$  = 9.6, 2.8 Hz, 1H), 4.24 (dd,  $J$  = 11.2, 2.4 Hz, 1H), 4.12 (d,  $J$  = 10.4 Hz, 1H), 4.07 – 3.92 (m, 3H), 3.77 (t,  $J$  = 10.4 Hz, 1H).  $^{13}\text{C}$  NMR (101 MHz,  $\text{CDCl}_3$ )  $\delta$  152.7, 150.1, 140.8, 134.0, 133.8, 131.4, 131.0, 130.4, 129.2, 129.1, 128.6, 124.4, 123.1, 75.1, 67.6, 67.0, 66.6. HRMS (ESI):  $m/z$   $[\text{M} + \text{H}]^+$  calcd for  $\text{C}_{18}\text{H}_{15}\text{ClN}_2\text{O}_3$ : 343.0849, found 343.0849.

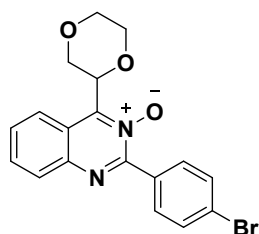

**2-(4-bromophenyl)-4-(1,4-dioxan-2-yl)quinazoline 3-oxide (3h).** Compound was obtained as a yellow solid: yield 60%;  $^1\text{H}$  NMR (400 MHz,  $\text{CDCl}_3$ )  $\delta$  8.85 (d,  $J$  = 8.4 Hz, 1H), 8.22 (d,  $J$  = 8.4 Hz, 2H), 7.99 (d,  $J$  = 8.4 Hz, 1H), 7.73 (t,  $J$  = 7.4 Hz, 1H), 7.67-7.57 (m, 3H), 6.07 (dd,  $J$  = 9.6, 2.8 Hz, 1H), 4.24 (dd,  $J$  = 11.2, 2.4 Hz, 1H), 4.11 (d,  $J$  = 11.2 Hz, 1H), 4.05 – 3.90 (m, 3H), 3.76 (t,  $J$  = 10.6, 1H).  $^{13}\text{C}$  NMR (101 MHz,  $\text{CDCl}_3$ )  $\delta$  153.1, 150.0, 140.8, 132.0, 131.3, 131.2, 131.1, 129.2, 128.9, 125.6, 124.4, 123.0, 75.1, 67.6, 67.0, 66.6. HRMS (ESI):  $m/z$   $[\text{M} + \text{H}]^+$  calcd for  $\text{C}_{18}\text{H}_{15}\text{BrN}_2\text{O}_3$ : 387.0344, found 387.0343.

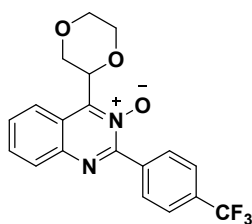

**4-(1,4-dioxan-2-yl)-2-(4-(trifluoromethyl)phenyl)quinazoline 3-oxide (3i).** Compound was obtained as a yellow solid: yield 77%;  $^1\text{H}$  NMR (400 MHz,  $\text{CDCl}_3$ )  $\delta$  8.90 (d,  $J$  = 8.4 Hz, 1H), 8.40 (d,  $J$  = 8.0 Hz, 2H), 8.03 (d,  $J$  = 8.4 Hz, 1H), 7.80-7.73 (m, 3H), 7.69-7.63 (m, 1H), 6.09 (dd,  $J$  = 9.6, 2.8 Hz, 1H), 4.25 (dd,  $J$  = 11.2, 2.4 Hz, 1H), 4.12 (d,  $J$  = 10.8 Hz, 1H), 4.07 – 3.90 (m, 3H), 3.78 (t,  $J$  = 10.4, 1H).  $^{13}\text{C}$  NMR (101 MHz,  $\text{CDCl}_3$ )  $\delta$  152.9, 150.4, 141.0, 135.7, 132.4 (q,  $^2J$  = 33.1 Hz), 131.7, 130.9, 129.4, 128.4, 125.0 (q,  $^3J$  = 3.7 Hz), 124.6, 124.0 (q,  $J$  = 270.9 Hz), 123.3, 75.2, 67.7, 67.1, 66.7. HRMS (ESI):  $m/z$   $[\text{M} + \text{H}]^+$  calcd for  $\text{C}_{19}\text{H}_{15}\text{F}_3\text{N}_2\text{O}_3$ : 377.1113, found 377.1100.

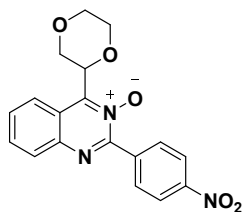

**4-(1,4-dioxan-2-yl)-2-(4-nitrophenyl)quinazoline 3-oxide (3j).** Compound was obtained as a yellow solid: yield 50%;  $^1\text{H}$  NMR (400 MHz,  $\text{CDCl}_3$ )  $\delta$  8.93 (d,  $J = 8.4$  Hz, 1H), 8.21 (d,  $J = 8.0$  Hz, 1H), 8.02 (d,  $J = 8.4$  Hz, 1H), 7.85 – 7.64 (m, 5H), 5.96 (dd,  $J = 9.6, 2.4$  Hz, 1H), 4.15 (dd,  $J = 11.2, 2.2$  Hz, 1H), 4.09 (d,  $J = 10.0$  Hz, 1H), 4.01–3.87 (m, 3H), 3.73 (t,  $J = 10.4$  Hz, 1H).  $^{13}\text{C}$  NMR (101 MHz,  $\text{CDCl}_3$ )  $\delta$  153.8, 149.0, 148.6, 140.9, 134.0, 131.9, 131.5, 131.1, 129.4, 129.1, 128.1, 124.8, 123.9, 123.4, 74.9, 67.5, 66.9, 66.6. HRMS (ESI):  $m/z$   $[\text{M} + \text{H}]^+$  calcd for  $\text{C}_{18}\text{H}_{15}\text{N}_3\text{O}_5$ : 354.1090, found 354.1090.

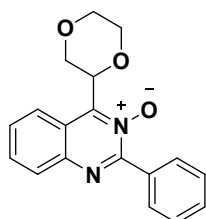

**4-(1,4-dioxan-2-yl)-2-phenylquinazoline 3-oxide (3k).** Compound was obtained as a yellow solid: yield 80%;  $^1\text{H}$  NMR (400 MHz,  $\text{CDCl}_3$ )  $\delta$  8.86 (d,  $J = 8.4$  Hz, 1H), 8.29 – 8.20 (m, 2H), 8.01 (d,  $J = 8.4$  Hz, 1H), 7.76 – 7.69 (m, 1H), 7.66 – 7.57 (m, 1H), 7.56 – 7.45 (m, 3H), 6.10 (dd,  $J = 9.6, 2.8$  Hz, 1H), 4.25 (dd,  $J = 11.2, 2.8$  Hz, 1H), 4.11 (d,  $J = 11.2$  Hz, 1H), 4.05 – 3.90 (m, 3H), 3.77 (t,  $J = 10.4$  Hz, 1H).  $^{13}\text{C}$  NMR (101 MHz,  $\text{CDCl}_3$ )  $\delta$  154.2, 149.8, 140.9, 132.2, 131.2, 130.9, 130.3, 129.2, 128.8, 128.0, 124.3, 123.0, 75.1, 67.6, 67.0, 66.6. HRMS (ESI):  $m/z$   $[\text{M} + \text{H}]^+$  calcd for  $\text{C}_{18}\text{H}_{16}\text{N}_2\text{O}_3$ : 309.1239, found 309.1240.

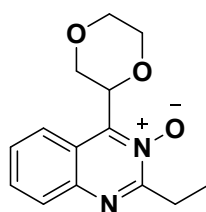

**4-(1,4-dioxan-2-yl)-2-ethylquinazoline 3-oxide (3l).** Compound was obtained as a yellow solid: yield 74%;  $^1\text{H}$  NMR (400 MHz,  $\text{CDCl}_3$ )  $\delta$  8.80 (d,  $J = 8.4$  Hz, 1H), 7.94 (d,  $J = 8.4$  Hz, 1H), 7.70 (t,  $J = 8.0$  Hz, 1H), 7.57 (t,  $J = 7.8$  Hz, 1H), 6.07 (dd,  $J = 9.6, 2.8$  Hz, 1H), 4.19 (dd,  $J = 11.2, 2.4$  Hz, 1H), 4.09 (d,  $J = 10.8$  Hz, 1H), 4.04 – 3.90 (m, 3H), 3.76 (t,  $J = 10.4$  Hz, 1H), 3.31–3.18 (m, 1H), 1.44 (t,  $J = 7.4$  Hz, 3H).  $^{13}\text{C}$  NMR (101 MHz,  $\text{CDCl}_3$ )  $\delta$  159.9, 148.1, 140.3, 130.8, 128.6, 128.0, 124.3, 122.5, 77.4, 77.1, 76.8, 74.8, 67.5, 66.9, 66.6, 25.6, 9.9. HRMS (ESI):  $m/z$   $[\text{M} + \text{H}]^+$  calcd for  $\text{C}_{14}\text{H}_{16}\text{N}_2\text{O}_3$ : 261.1239, found 261.1236.

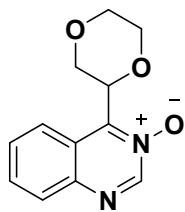

**4-(1,4-dioxan-2-yl)quinazoline 3-oxide (3m).** Compound was obtained as a white solid: yield 54%;  $^1\text{H}$  NMR (400 MHz,  $\text{CDCl}_3$ )  $\delta$  8.93 (s, 1H), 8.84 (d,  $J = 8.4$  Hz, 1H), 7.98 (d,  $J = 8.4$  Hz, 1H), 7.79 – 7.72 (m, 1H), 7.71 – 7.63 (m, 1H), 6.02 (dd,  $J = 9.8$ , 2.8 Hz, 1H), 4.19 (dd,  $J = 11.2$ , 2.8 Hz, 1H), 4.10 (d,  $J = 10.8$  Hz, 1H), 4.04 – 3.90 (m, 3H), 3.74 (t,  $J = 10.4$ , Hz, 1H).  $^{13}\text{C}$  NMR (101 MHz,  $\text{CDCl}_3$ )  $\delta$  148.4, 147.1, 141.2, 131.3, 129.5, 129.1, 124.8, 123.1, 74.3, 67.5, 66.9, 66.6. HRMS (ESI):  $m/z$   $[\text{M} + \text{H}]^+$  calcd for  $\text{C}_{12}\text{H}_{12}\text{N}_2\text{O}_3$ : 233.0926, found 233.0926.

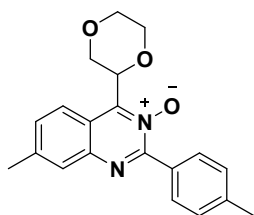

**4-(1,4-dioxan-2-yl)-7-methyl-2-(p-tolyl)quinazoline 3-oxide (3n).** Compound was obtained as a light yellow solid: yield 71%;  $^1\text{H}$  NMR (400 MHz,  $\text{CDCl}_3$ )  $\delta$  8.73 (d,  $J = 8.8$  Hz, 1H), 8.19 (d,  $J = 8.0$  Hz, 2H), 7.78 (s, 1H), 7.42 (d,  $J = 8.8$  Hz, 1H), 7.30 (d,  $J = 8.0$  Hz, 2H), 6.09 (dd,  $J = 9.6$ , 2.8 Hz, 1H), 4.25 (dd,  $J = 11.2$ , 2.4 Hz, 1H), 4.10 (d,  $J = 11.2$  Hz, 1H), 4.05 – 3.89 (m, 3H), 3.74 (t,  $J = 10.4$ , 1H), 2.54 (s, 3H), 2.43 (s, 3H).  $^{13}\text{C}$  NMR (101 MHz,  $\text{CDCl}_3$ )  $\delta$  154.2, 149.7, 142.0, 142.3, 141.2, 130.7, 130.3, 129.5, 128.6, 128.2, 123.9, 120.9, 75.2, 67.6, 67.1, 66.6, 21.8, 21. HRMS (ESI):  $m/z$   $[\text{M} + \text{H}]^+$  calcd for  $\text{C}_{20}\text{H}_{20}\text{N}_2\text{O}_3$ : 337.1552, found 337.1556.

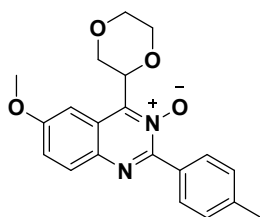

**4-(1,4-dioxan-2-yl)-6-methoxy-2-(p-tolyl)quinazoline 3-oxide (3o).** Compound was obtained as a light yellow solid: yield 68%;  $^1\text{H}$  NMR (400 MHz,  $\text{CDCl}_3$ )  $\delta$  8.16 (d,  $J = 8.0$  Hz, 3H), 7.89 (d,  $J = 9.2$  Hz, 1H), 7.35 (dd,  $J = 9.2$ , 2.8 Hz, 1H), 7.29 (d,  $J = 8.0$  Hz, 2H), 6.10 (dd,  $J = 9.6$ , 2.4 Hz, 1H), 4.24 (dd,  $J = 11.2$ , 2.4 Hz, 1H), 4.09 (d,  $J = 11.6$  Hz, 1H), 4.05–3.99 (m, 1H), 3.96 (s, 3H), 3.93–3.85 (m, 2H), 3.77 (t,  $J = 10.4$  Hz, 1H), 2.42 (s, 3H).  $^{13}\text{C}$  NMR (101 MHz,  $\text{CDCl}_3$ )  $\delta$  158.9, 152.3, 148.3, 140.9, 137.0, 130.5, 130.1, 129.5, 128.6, 124.1, 123.1, 102.7, 75.1, 67.61, 66.74, 66.69, 55.6, 21.5. HRMS (ESI):  $m/z$   $[\text{M} + \text{H}]^+$  calcd for  $\text{C}_{20}\text{H}_{20}\text{N}_2\text{O}_4$ : 353.1501, found 353.1499.

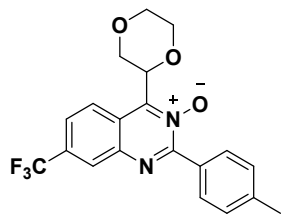

**4-(1,4-dioxan-2-yl)-2-(p-tolyl)-7-(trifluoromethyl)quinazoline 3-oxide (3p).**

Compound was obtained as a yellow oil liquid: yield 77%;  $^1\text{H}$  NMR (400 MHz,  $\text{CDCl}_3$ )  $\delta$  8.98 (d,  $J = 8.8$  Hz, 1H), 8.28 (s, 1H), 8.22 (d,  $J = 8.4$  Hz, 2H), 7.74 (d,  $J = 9.2$  Hz, 1H), 7.32 (d,  $J = 8.4$  Hz, 2H), 6.03 (dd,  $J = 9.6$ , 2.4 Hz, 1H), 4.26 (dd,  $J = 11.2$ , 2.4 Hz, 1H), 4.12 (d,  $J = 10.8$  Hz, 1H), 4.06 – 3.90 (m, 3H), 3.71 (t,  $J = 10.6$ , 1H), 2.45 (s, 3H).  $^{13}\text{C}$  NMR (101 MHz,  $\text{CDCl}_3$ )  $\delta$  155.5, 149.7, 142.0, 139.7, 132.3 (q,  $^2J = 33.0$  Hz), 130.4, 128.8, 128.6, 126.6 (q,  $^3J = 4.4$  Hz), 125.5, 124.4, 124.1 (q,  $^3J = 3.0$  Hz), 123.4 (q,  $^1J = 270.9$  Hz), 75.2, 67.6, 66.9, 66.6, 21.6. HRMS (ESI):  $m/z$   $[\text{M} + \text{H}]^+$  calcd for  $\text{C}_{20}\text{H}_{17}\text{F}_3\text{N}_2\text{O}_3$ : 391.1270, found 391.1266.

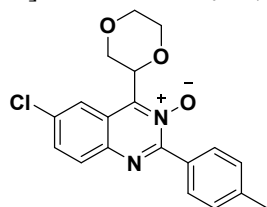

**6-chloro-4-(1,4-dioxan-2-yl)-2-(p-tolyl)quinazoline 3-oxide (3q).** Compound was obtained as a yellow solid: yield 82%;  $^1\text{H}$  NMR (400 MHz,  $\text{CDCl}_3$ )  $\delta$  8.82 (d,  $J = 2.0$  Hz, 1H), 8.18 (d,  $J = 8.0$  Hz, 2H), 7.91 (d,  $J = 8.8$  Hz, 1H), 7.63 (dd,  $J = 8.8$ , 2.4 Hz, 1H), 7.31 (d,  $J = 8.0$  Hz, 2H), 6.01 (dd,  $J = 9.6$ , 2.8 Hz, 1H), 4.25 (dd,  $J = 11.2$ , 2.8 Hz, 1H), 4.14 (d,  $J = 9.6$  Hz, 1H), 4.04 – 3.91 (m, 3H), 3.70 (t,  $J = 10.4$  Hz, 1H), 2.43 (s, 3H).  $^{13}\text{C}$  NMR (101 MHz,  $\text{CDCl}_3$ )  $\delta$  154.4, 148.9, 141.7, 139.1, 134.4, 131.7, 130.5, 130.3, 128.9, 128.7, 123.5, 123.0, 75.3, 67.6, 66.8, 66.6, 21.6. HRMS (ESI):  $m/z$   $[\text{M} + \text{H}]^+$  calcd for  $\text{C}_{19}\text{H}_{17}\text{ClN}_2\text{O}_3$ : 357.1006, found 357.1005.

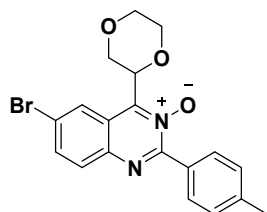

**6-bromo-4-(1,4-dioxan-2-yl)-2-(p-tolyl)quinazoline 3-oxide (3r).** Compound was obtained as a yellow solid: yield 53%;  $^1\text{H}$  NMR (400 MHz,  $\text{CDCl}_3$ )  $\delta$  8.99 (d,  $J = 2.0$  Hz, 1H), 8.18 (d,  $J = 8.4$  Hz, 2H), 7.84 (d,  $J = 8.8$  Hz, 1H), 7.76 (dd,  $J = 9.0$ , 2.2 Hz, 1H), 7.31 (d,  $J = 8.4$  Hz, 2H), 6.00 (dd,  $J = 9.6$ , 2.4 Hz, 1H), 4.25 (dd,  $J = 11.2$ , 2.8 Hz, 1H), 4.14 (d,  $J = 9.6$  Hz, 1H), 4.04 – 3.89 (m, 3H), 3.70 (t,  $J = 10.0$ , 1H), 2.43 (s, 3H).  $^{13}\text{C}$  NMR (101 MHz,  $\text{CDCl}_3$ )  $\delta$  154.5, 148.8, 141.7, 139.3, 134.3, 130.6, 130.3, 128.9, 128.7, 126.2, 123.9, 122.7, 75.3, 67.6, 66.8, 66.6, 21.6. HRMS (ESI):  $m/z$   $[\text{M} + \text{H}]^+$  calcd for  $\text{C}_{19}\text{H}_{17}\text{BrN}_2\text{O}_3$ : 401.0501, found 401.0498.

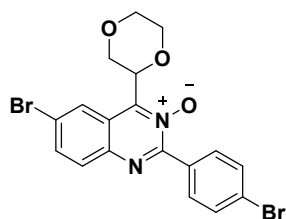

**6-bromo-2-(4-bromophenyl)-4-(1,4-dioxan-2-yl)quinazoline 3-oxide (3s).**

Compound was obtained as a yellow solid: yield 67%;  $^1\text{H}$  NMR (400 MHz,  $\text{CDCl}_3$ )  $\delta$  9.00 (d,  $J = 2.0$  Hz, 1H), 8.21 (d,  $J = 8.8$  Hz, 2H), 7.84 (d,  $J = 8.8$  Hz, 1H), 7.78 (dd,  $J = 8.8, 2.0$  Hz, 1H), 7.63 (d,  $J = 8.8$  Hz, 2H), 5.98 (dd,  $J = 9.6, 2.8$  Hz, 1H), 4.23 (dd,  $J = 11.2, 2.4$  Hz, 1H), 4.14 (d,  $J = 9.2$  Hz, 1H), 4.04 – 3.89 (m, 3H), 3.69 (t,  $J = 10.0$ , Hz, 1H).  $^{13}\text{C}$  NMR (101 MHz,  $\text{CDCl}_3$ )  $\delta$  153.3, 149.1, 139.2, 134.7, 132.0, 131.3, 130.6, 126.4, 126.0, 124.1, 123.3, 75.2, 67.6, 66.8, 66.6. HRMS (ESI):  $m/z$   $[\text{M} + \text{H}]^+$  calcd for  $\text{C}_{18}\text{H}_{14}\text{Br}_2\text{N}_2\text{O}_3$ : 464.9449, found 464.9448.

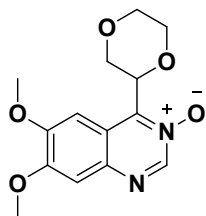

**4-(1,4-dioxan-2-yl)-6,7-dimethoxyquinazoline 3-oxide (3t).** Compound was obtained as a white solid: yield 59%;  $^1\text{H}$  NMR (400 MHz,  $\text{CDCl}_3$ )  $\delta$  8.87 (s, 1H), 8.18 (s, 1H), 7.28 (s, 1H), 6.05 (dd,  $J = 9.8, 2.6$  Hz, 1H), 4.23 (dd,  $J = 11.8, 2.6$  Hz, 1H), 4.04 (s, 6H), 4.02 – 3.92 (m, 2H), 3.89–3.84 (m, 1H), 3.70 (t,  $J = 10.6$  Hz, 1H).  $^{13}\text{C}$  NMR (101 MHz,  $\text{CDCl}_3$ )  $\delta$  153.8, 151.3, 147.2, 145.4, 139.6, 119.1, 107.8, 102.7, 74.3, 67.6, 66.9, 66.7, 56.4, 56.1. HRMS (ESI):  $m/z$   $[\text{M} + \text{H}]^+$  calcd for  $\text{C}_{14}\text{H}_{16}\text{N}_2\text{O}_5$ : 293.1137, found 293.1136.

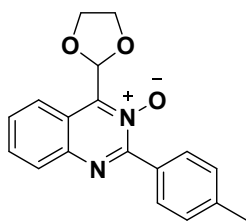

**4-(1,3-dioxolan-2-yl)-2-(p-tolyl)quinazoline 3-oxide (3u).** Compound was obtained as a yellow solid: yield 65%;  $^1\text{H}$  NMR (400 MHz,  $\text{CDCl}_3$ )  $\delta$  8.38 (d,  $J = 8.8$  Hz, 1H), 8.21 (d,  $J = 8.4$  Hz, 2H), 7.98 (d,  $J = 8.0$  Hz, 1H), 7.73–7.64 (m, 1H), 7.62–7.53 (m, 1H), 7.31 (d,  $J = 8.0$  Hz, 2H), 6.88 (s, 1H), 4.43–4.31 (m, 2H), 4.27–4.13 (m, 2H), 2.43 (s, 3H).  $^{13}\text{C}$  NMR (101 MHz,  $\text{CDCl}_3$ )  $\delta$  154.9, 147.0, 141.3, 140.7, 130.9, 130.4, 129.2, 129.1, 129.0, 128.6, 123.0, 122.3, 98.8, 65.6, 21.6. HRMS (ESI):  $m/z$   $[\text{M} + \text{H}]^+$  calcd for  $\text{C}_{18}\text{H}_{16}\text{N}_2\text{O}_3$ : 309.1239, found 309.1242.

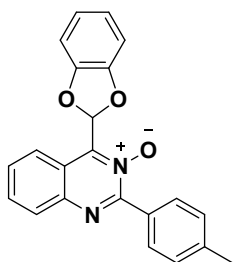

**4-(benzo[d][1,3]dioxol-2-yl)-2-(p-tolyl)quinazoline 3-oxide (3v).** Compound was obtained as a white solid: yield 51%;  $^1\text{H}$  NMR (400 MHz,  $\text{CDCl}_3$ )  $\delta$  8.26 (d,  $J$  = 8.4 Hz, 2H), 8.05 (s, 1H), 8.02 (d,  $J$  = 8.8 Hz, 2H), 7.68 (t,  $J$  = 7.8 Hz, 1H), 7.49 (t,  $J$  = 8.0, 1H), 7.33 (d,  $J$  = 8.0 Hz, 2H), 7.04 – 6.92 (m, 4H), 2.45 (s, 3H).  $^{13}\text{C}$  NMR (101 MHz,  $\text{CDCl}_3$ )  $\delta$  154.7, 146.8, 145.4, 141.7, 140.7, 131.1, 130.5, 129.7, 129.4, 128.8, 122.7, 122.2, 121.9, 109.4, 104.7, 21.7. HRMS (ESI):  $m/z$   $[\text{M} + \text{H}]^+$  calcd for  $\text{C}_{22}\text{H}_{16}\text{N}_2\text{O}_3$ : 356.1239, found 357.1237.

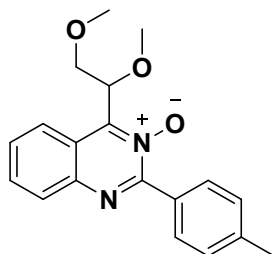

**4-(1,2-dimethoxyethyl)-2-(p-tolyl)quinazoline 3-oxide (3w).** Compound was obtained as a yellow liquid: yield 41%;  $^1\text{H}$  NMR (400 MHz,  $\text{CDCl}_3$ )  $\delta$  8.77 (d,  $J$  = 8.8 Hz, 1H), 8.21 (d,  $J$  = 8.0 Hz, 2H), 8.01 (d,  $J$  = 8.4 Hz, 1H), 7.73 (t,  $J$  = 7.8 Hz, 1H), 7.60 (t,  $J$  = 7.6 Hz, 1H), 7.32 (d,  $J$  = 8.0 Hz, 2H), 5.92 (dd,  $J$  = 6.4, 2.8 Hz, 1H), 4.03 (dd,  $J$  = 10.8, 6.4 Hz, 1H), 3.81 (dd,  $J$  = 10.8, 2.8 Hz, 1H), 3.45 (s, 3H), 3.43 (s, 3H), 2.44 (s, 3H).  $^{13}\text{C}$  NMR (100 MHz,  $\text{CDCl}_3$ )  $\delta$  154.5, 151.2, 141.3, 140.7, 131.2, 130.4, 129.3, 129.3, 129.0, 128.9, 128.7, 128.3, 124.0, 123.1, 79.0, 72.2, 59.3, 58.6, 21.6. HRMS (ESI):  $m/z$   $[\text{M} + \text{H}]^+$  calcd for  $\text{C}_{19}\text{H}_{20}\text{N}_2\text{O}_3$ : 325.1552, found 325.1552.

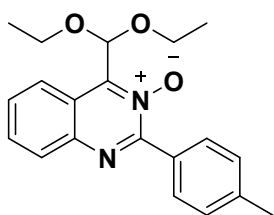

**4-(diethoxymethyl)-2-(p-tolyl)quinazoline 3-oxide (3x).** Compound was obtained as a white solid: yield 15%;  $^1\text{H}$  NMR (400 MHz,  $\text{CDCl}_3$ )  $\delta$  8.67 (d,  $J$  = 8.8 Hz, 1H), 8.17 (d,  $J$  = 8.0 Hz, 2H), 7.97 (d,  $J$  = 8.4 Hz, 1H), 7.72–7.68 (m, 1H), 7.59 (t,  $J$  = 7.6 Hz, 1H), 7.31 (d,  $J$  = 8.0 Hz, 2H), 6.80 (s, 1H), 3.95–4.03 (m, 2H), 3.78–3.71 (m, 2H), 2.43 (s, 3H), 1.28 (t,  $J$  = 7.0 Hz, 6H).  $^{13}\text{C}$  NMR (101 MHz,  $\text{CDCl}_3$ )  $\delta$  154.6, 141.3, 141.2, 131.2, 130.3, 129.5, 128.7, 128.6, 128.6, 125.2, 121.6, 100.0, 98.3, 65.3, 21.6, 15.4. HRMS (ESI):  $m/z$   $[\text{M} + \text{H}]^+$  calcd for  $\text{C}_{20}\text{H}_{22}\text{N}_2\text{O}_3$ : 339.1709, found 339.1701.

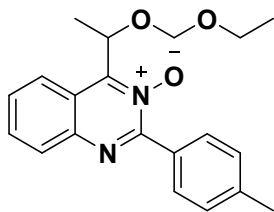

**4-(1-(ethoxymethoxy)ethyl)-2-(p-tolyl)quinazoline 3-oxide(3x').** Compound was obtained as a yellow solid: yield 32%;  $^1\text{H}$  NMR (400 MHz,  $\text{CDCl}_3$ )  $\delta$  8.69 (d,  $J = 8.8$  Hz, 1H), 8.23 (d,  $J = 8.4$  Hz, 2H), 8.00 (d,  $J = 8.4$  Hz, 1H), 7.74 – 7.66 (m, 1H), 7.62 – 7.55 (m, 1H), 7.31 (d,  $J = 8.0$  Hz, 2H), 6.16 (q,  $J = 6.8$  Hz, 1H), 4.79 (d,  $J = 6.8$  Hz, 1H), 4.68 (d,  $J = 6.8$  Hz, 1H), 3.61–3.53 (m, 1H), 3.43–3.35 (m, 1H), 2.43 (s, 3H), 1.75 (d,  $J = 6.8$  Hz, 3H), 0.99 (t,  $J = 7.0$  Hz, 3H).  $^{13}\text{C}$  NMR (101 MHz,  $\text{CDCl}_3$ )  $\delta$  155.0, 154.5, 141.2, 140.9, 130.8, 130.4, 129.5, 129.2, 128.6, 128.4, 123.9, 122.0, 95.2, 70.7, 64.1, 21.6, 19.3, 14.9. HRMS (ESI):  $m/z$   $[\text{M} + \text{H}]^+$  calcd for  $\text{C}_{20}\text{H}_{22}\text{N}_2\text{O}_3$ : 339.1709, found 339.1709.

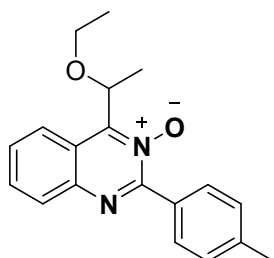

**4-(1-ethoxyethyl)-2-(p-tolyl)quinazoline 3-oxide(3y).** Compound was obtained as a yellow solid: yield 91%;  $^1\text{H}$  NMR (400 MHz,  $\text{CDCl}_3$ )  $\delta$  8.84 (d,  $J = 8.8$  Hz, 1H), 8.23 (d,  $J = 8.4$  Hz, 2H), 8.01 (d,  $J = 8.4$  Hz, 1H), 7.77 – 7.66 (m, 1H), 7.60–7.57 (m, 1H), 7.32 (d,  $J = 8.0$  Hz, 2H), 5.89 (q,  $J = 6.8$  Hz, 1H), 3.60–3.53 (m, 1H), 3.48–3.31 (m, 1H), 2.43 (s, 3H), 1.72 (d,  $J = 6.8$  Hz, 3H), 1.21 (t,  $J = 7.0$  Hz, 3H).  $^{13}\text{C}$  NMR (101 MHz,  $\text{CDCl}_3$ )  $\delta$  155.3, 154.5, 141.2, 140.8, 131.0, 130.5, 129.5, 129.2, 128.6, 128.6, 123.5, 122.1, 73.1, 65.7, 21.6, 19.2, 15.3. HRMS (ESI):  $m/z$   $[\text{M} + \text{H}]^+$  calcd for  $\text{C}_{19}\text{H}_{20}\text{N}_2\text{O}_2$ : 309.1603, found 309.1603.

Chemical structure of compound 10 is shown above the spectrum. The structure is a benzimidazole derivative with a 4-methoxyphenyl group and a 1,3-dioxolane ring.

<sup>1</sup>H NMR spectrum (CDCl<sub>3</sub>) of compound 10. The x-axis represents the chemical shift in ppm (0.0 to 9.0), and the y-axis represents the intensity (0 to 6500). The spectrum shows several peaks corresponding to the protons in the molecule. The peaks are labeled with their chemical shifts and integrations:

- 8.855, 8.833 (m, 1H)
- 8.195, 8.174 (m, 1H)
- 8.000, 7.980 (m, 1H)
- 7.729, 7.693, 7.691, 7.607, 7.589, 7.521, 7.510, 7.490, 7.402, 7.407, 7.395, 7.398, 7.392, 7.374, 7.369, 7.366 (m, 1H)
- 6.093, 6.086 (m, 1H)
- 4.270, 4.264, 4.242, 4.236, 4.117, 4.090, 4.041, 4.027, 4.022, 4.007, 3.979, 3.965, 3.938, 3.923, 3.794, 3.769, 3.766 (m, 1H)
- 3.000 (s, 3H)
- 0.97 (s, 3H)
- 0.95 (s, 3H)
- 1.04 (s, 3H)
- 0.99 (s, 3H)
- 0.99 (s, 3H)
- 0.97 (s, 3H)
- 0.97 (s, 3H)
- 0.98 (s, 3H)
- 1.00 (s, 3H)
- 2.96 (s, 3H)
- 1.01 (s, 3H)

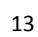

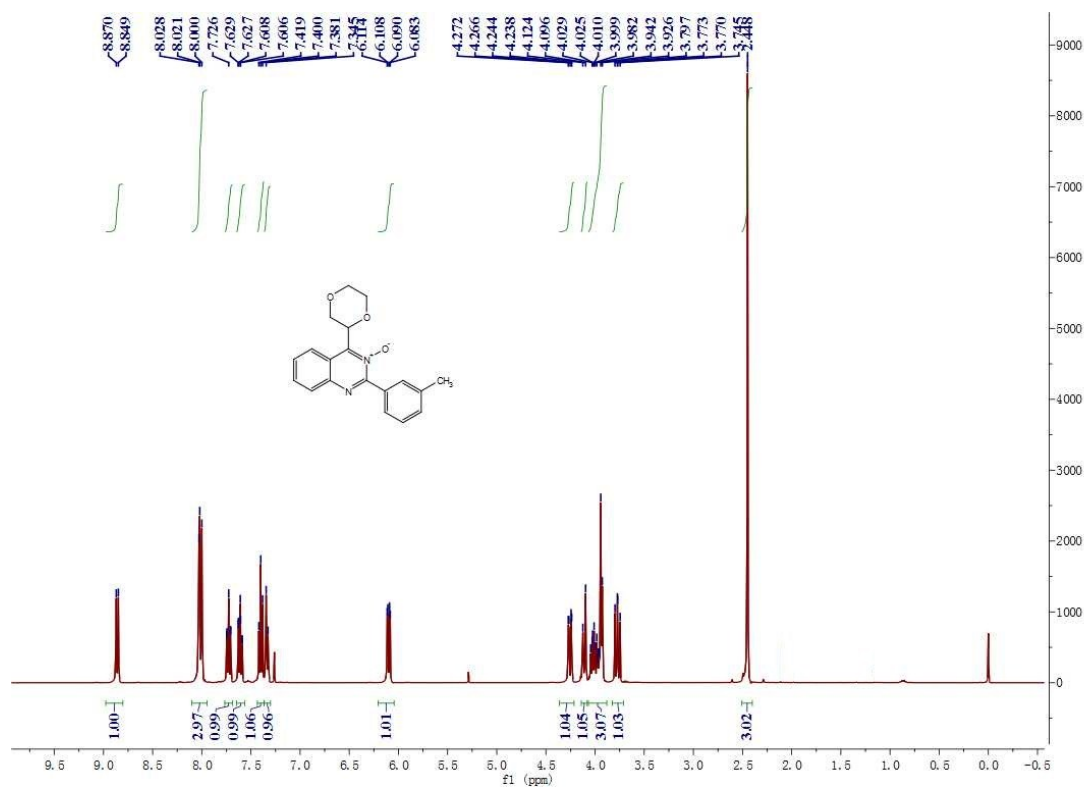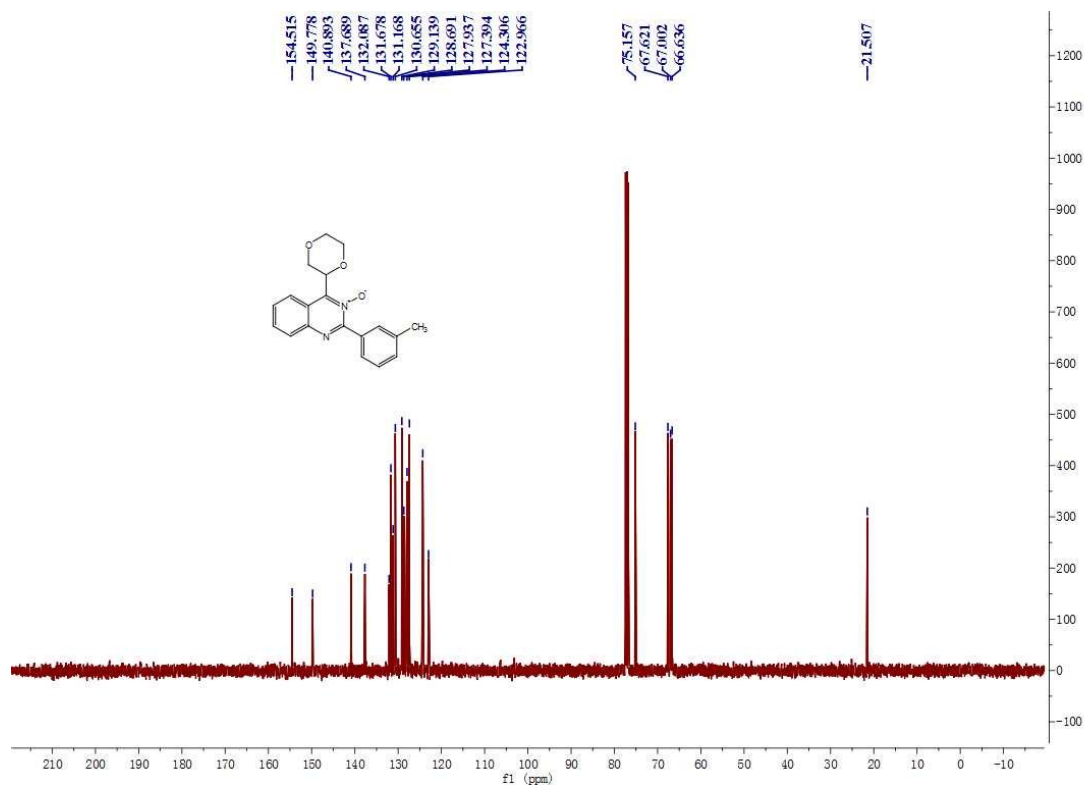

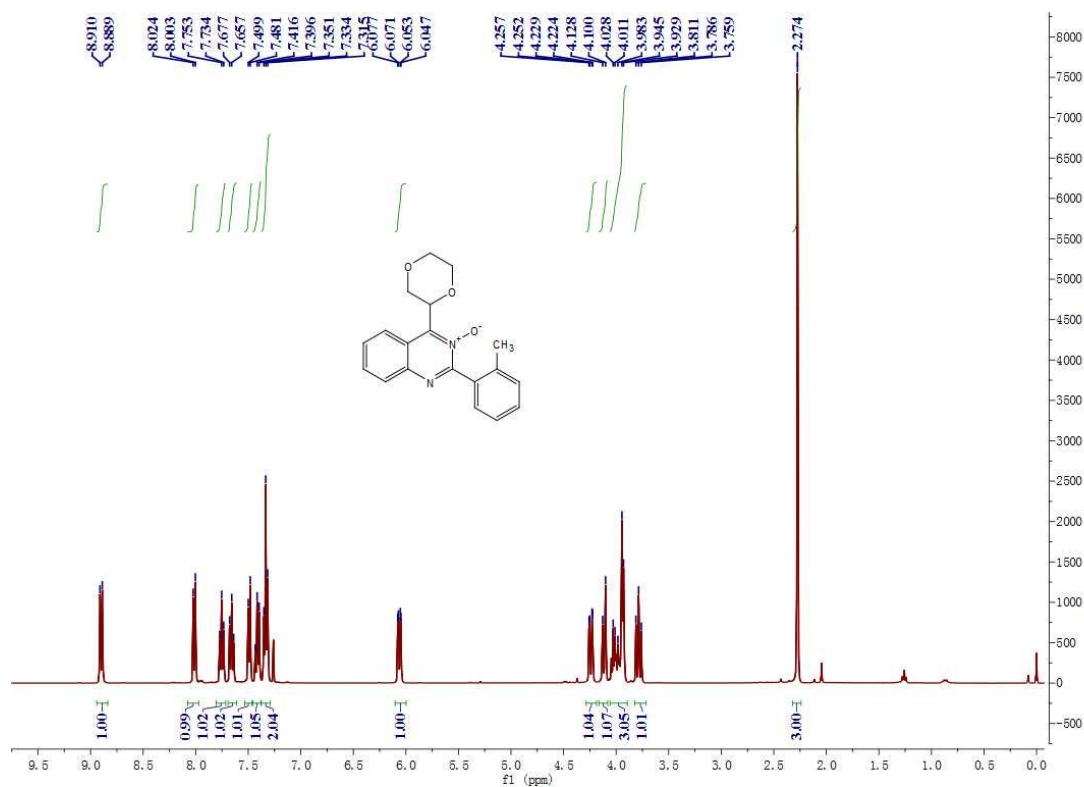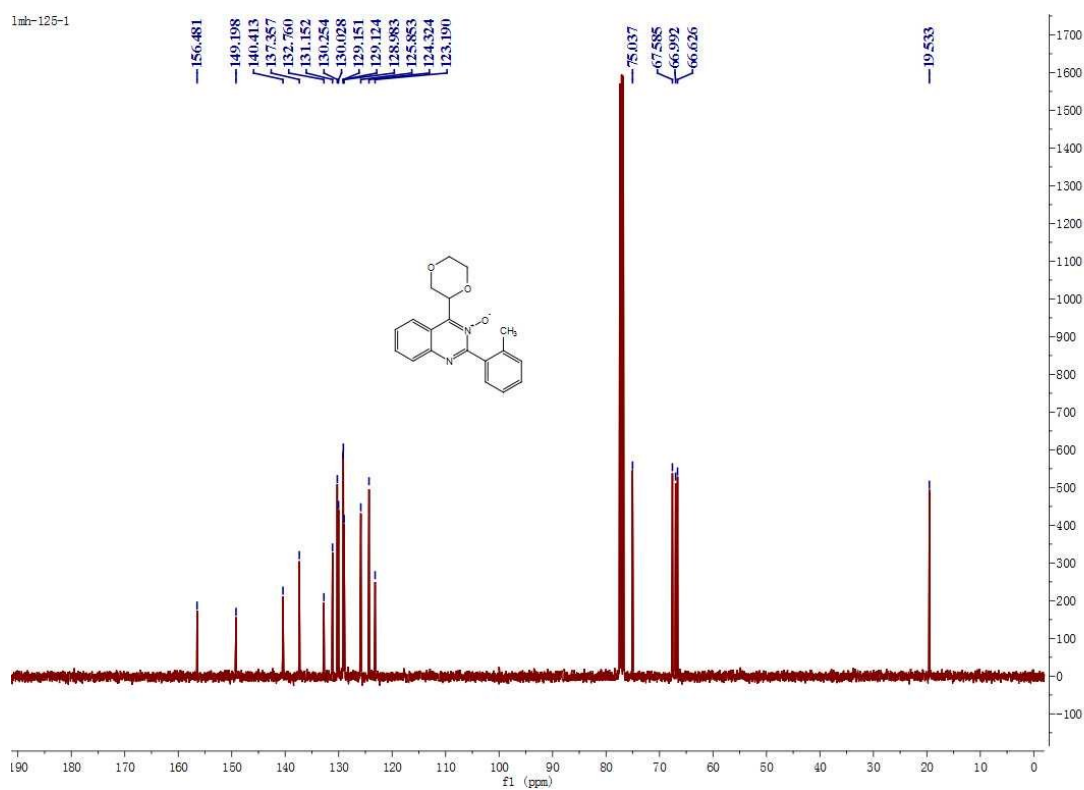

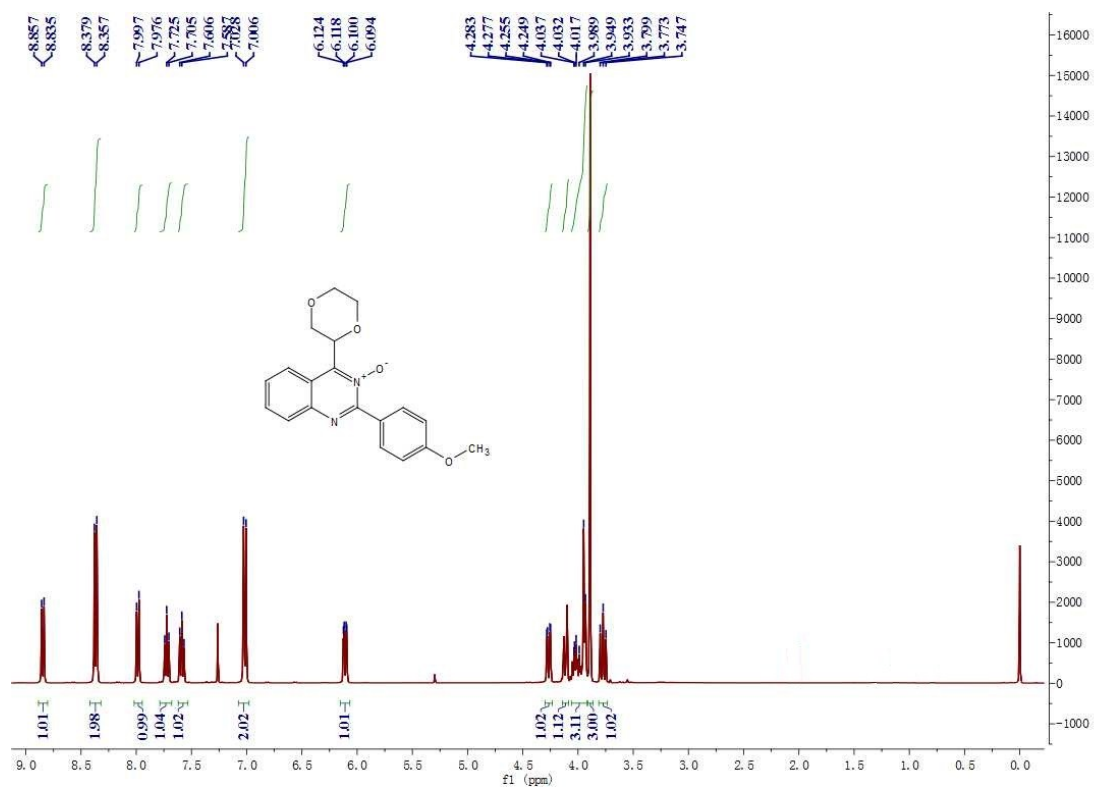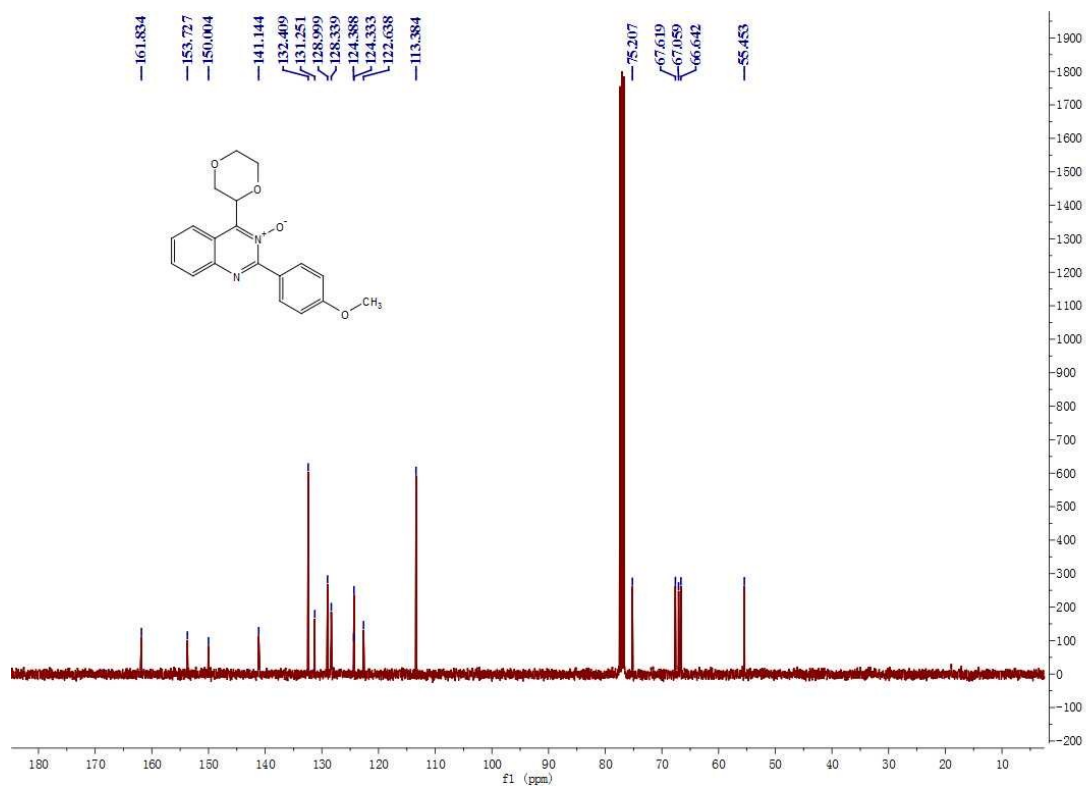

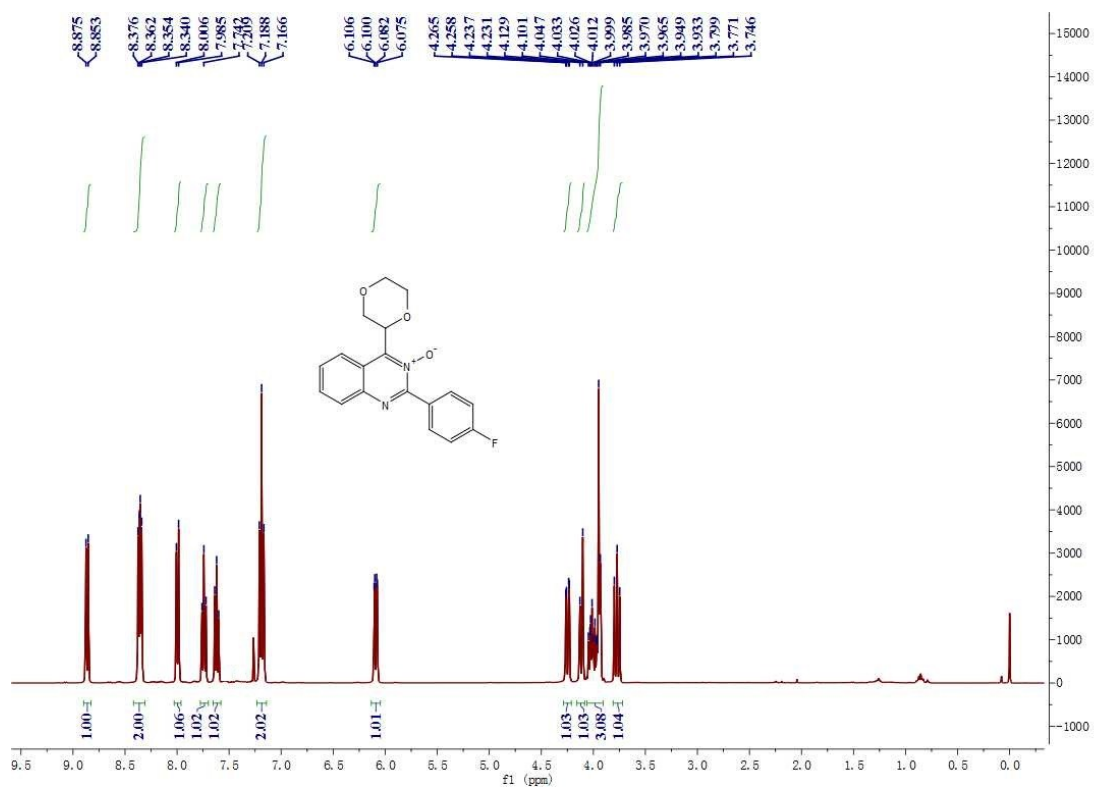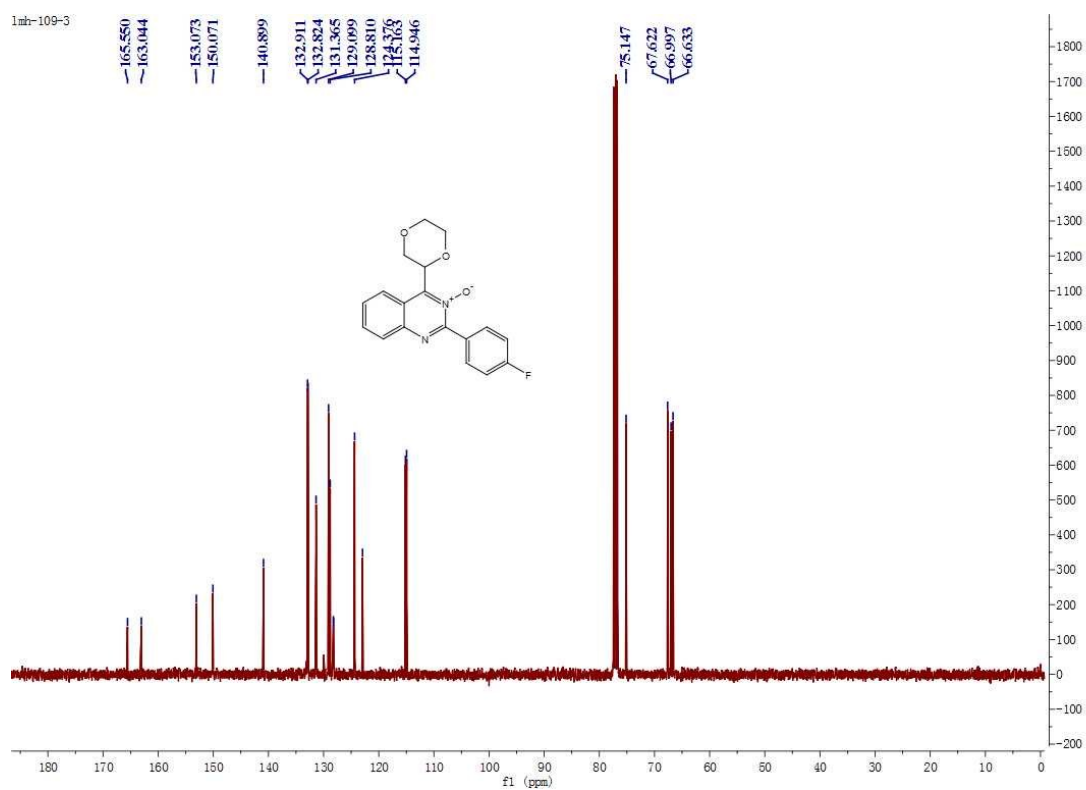

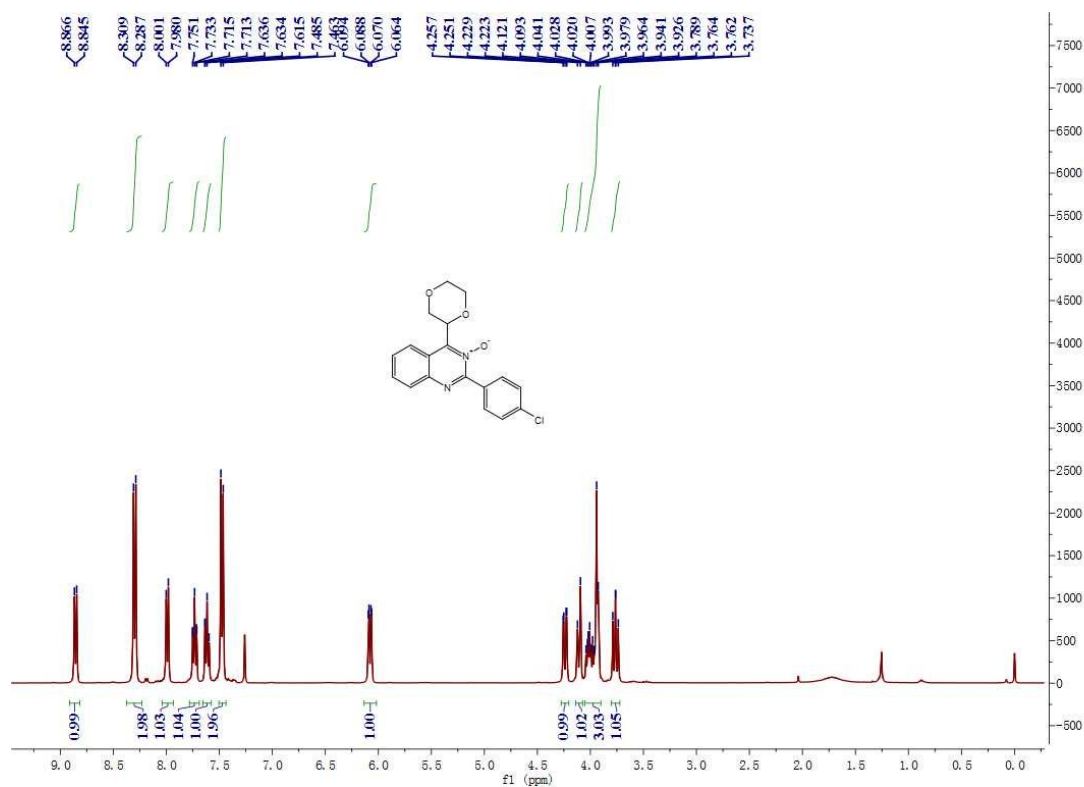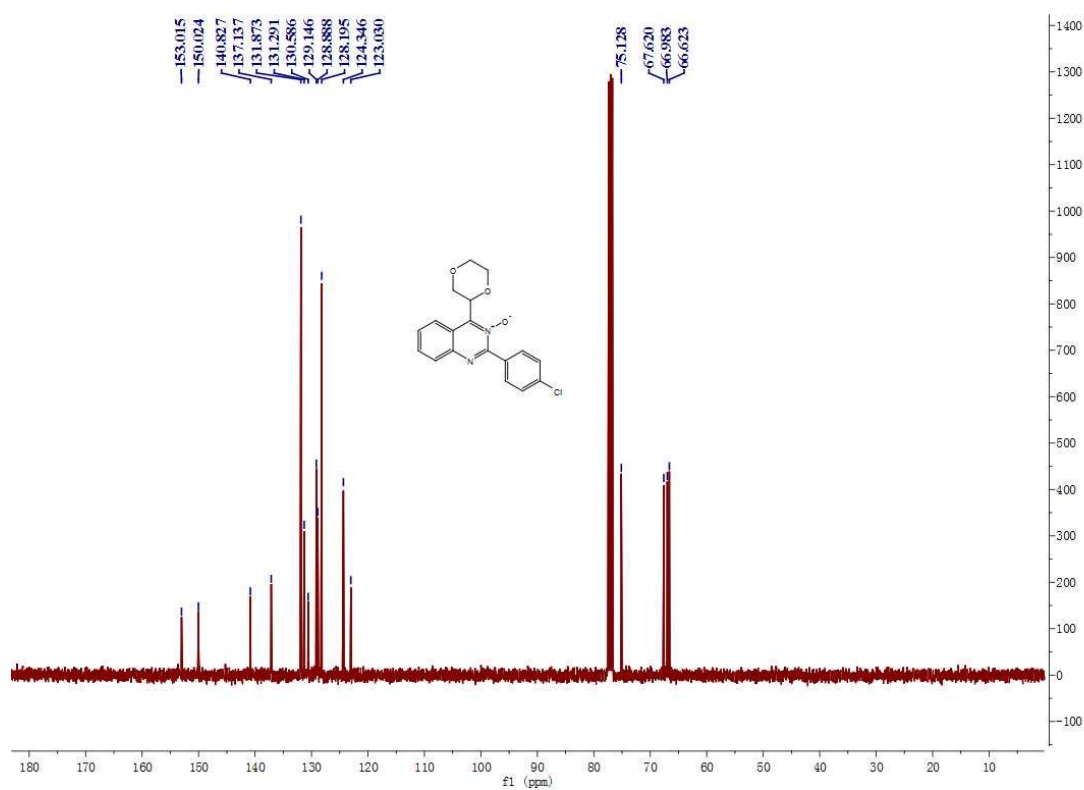

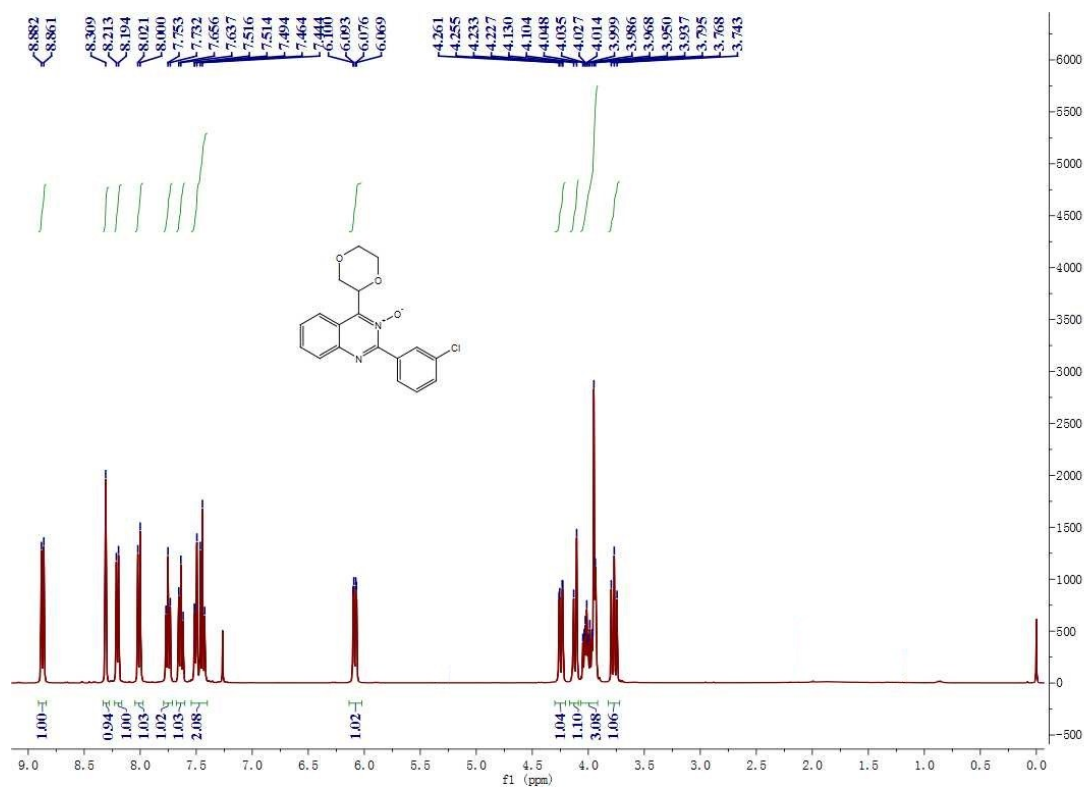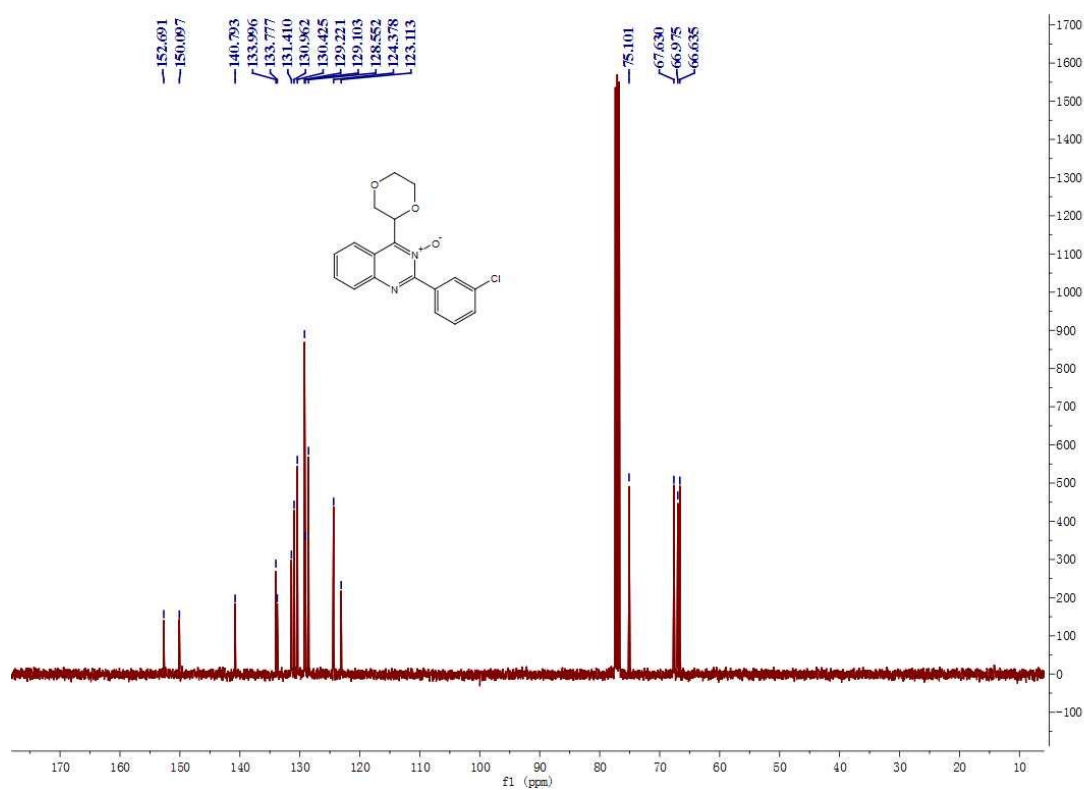

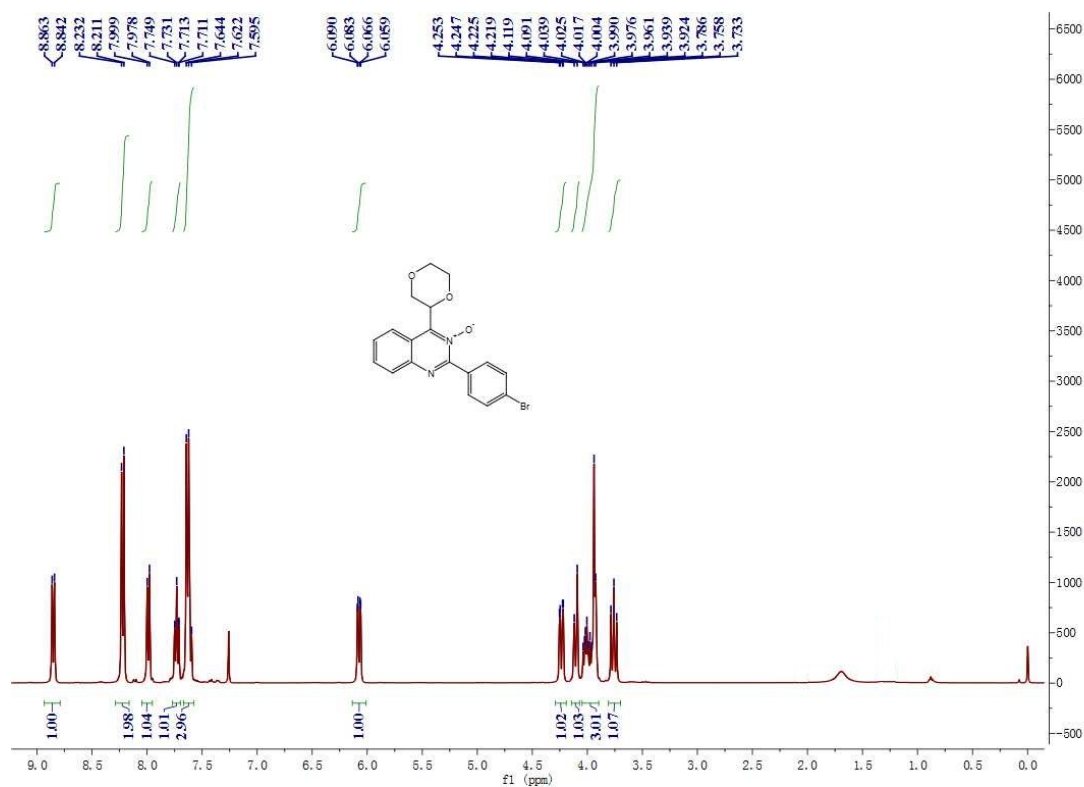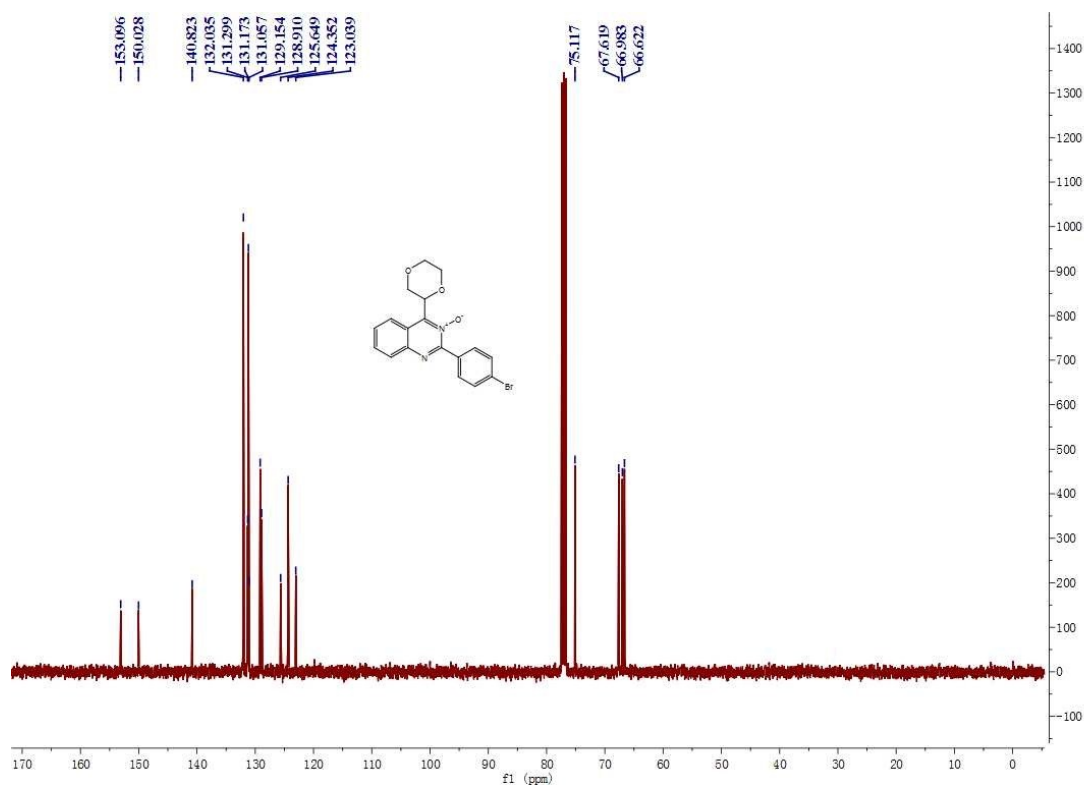

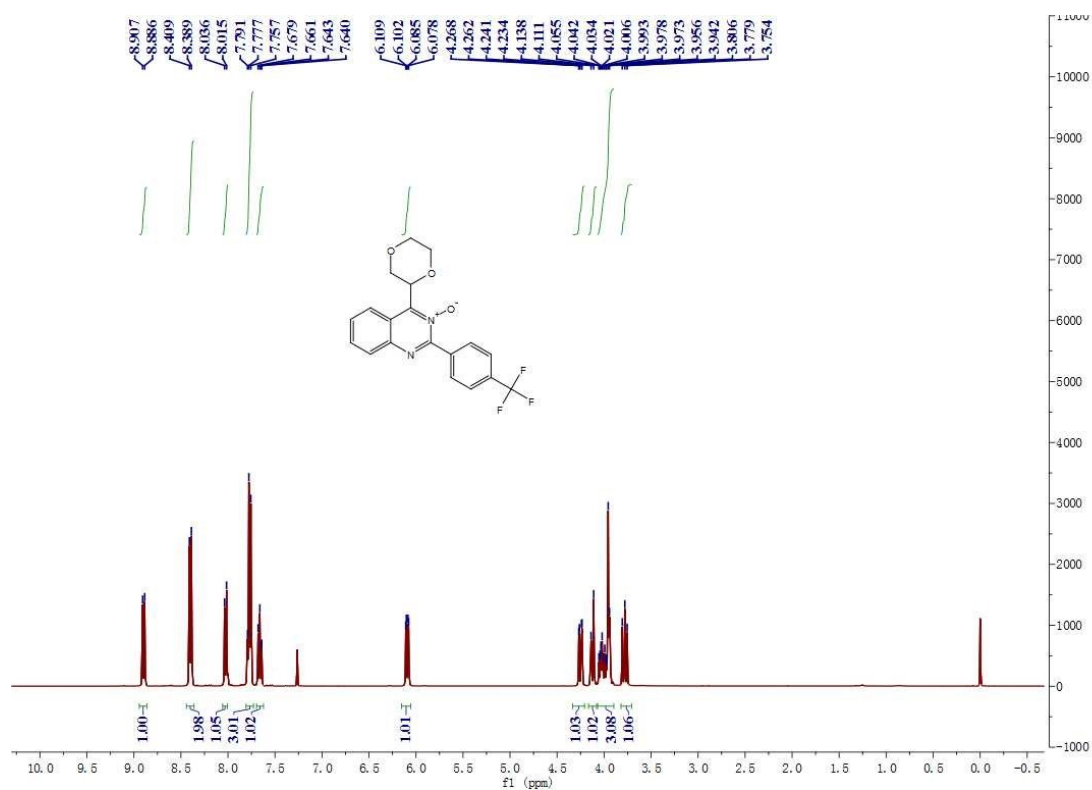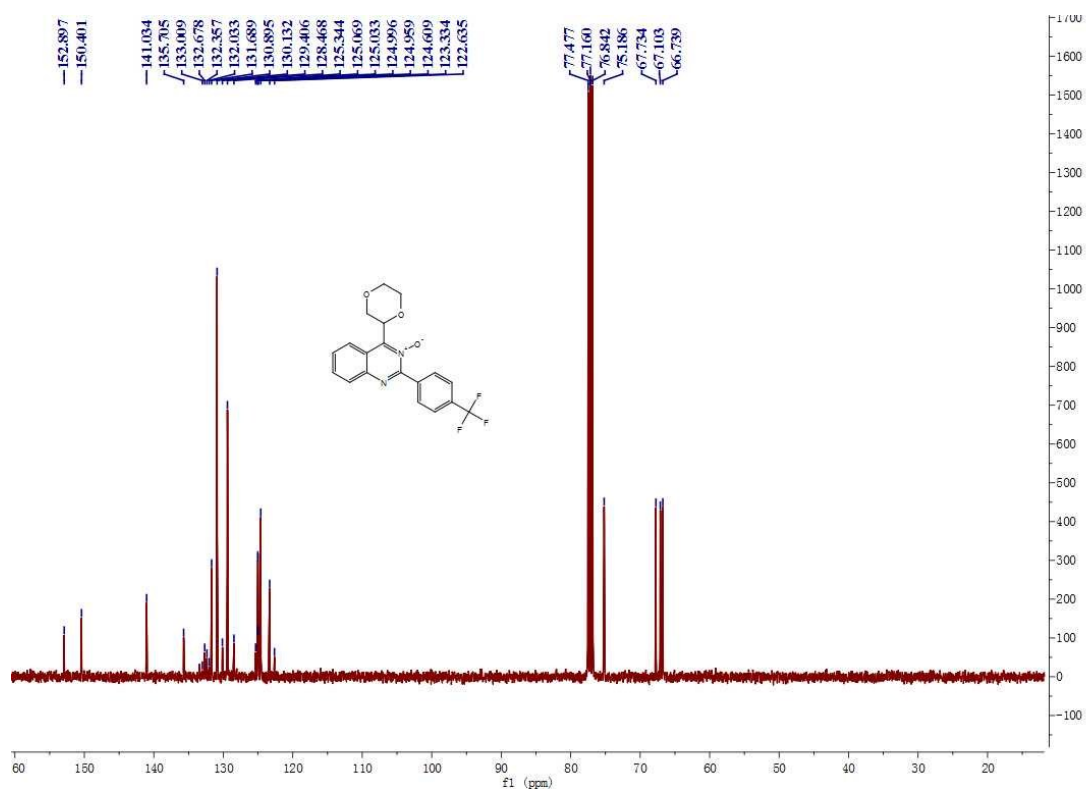

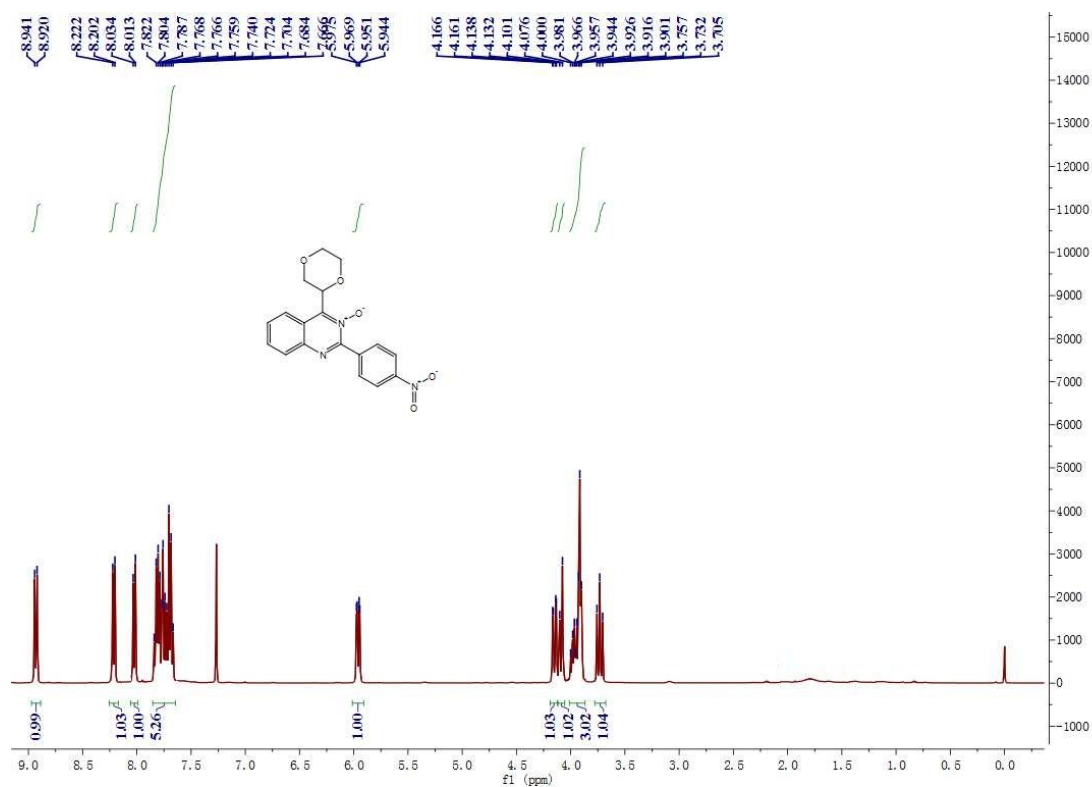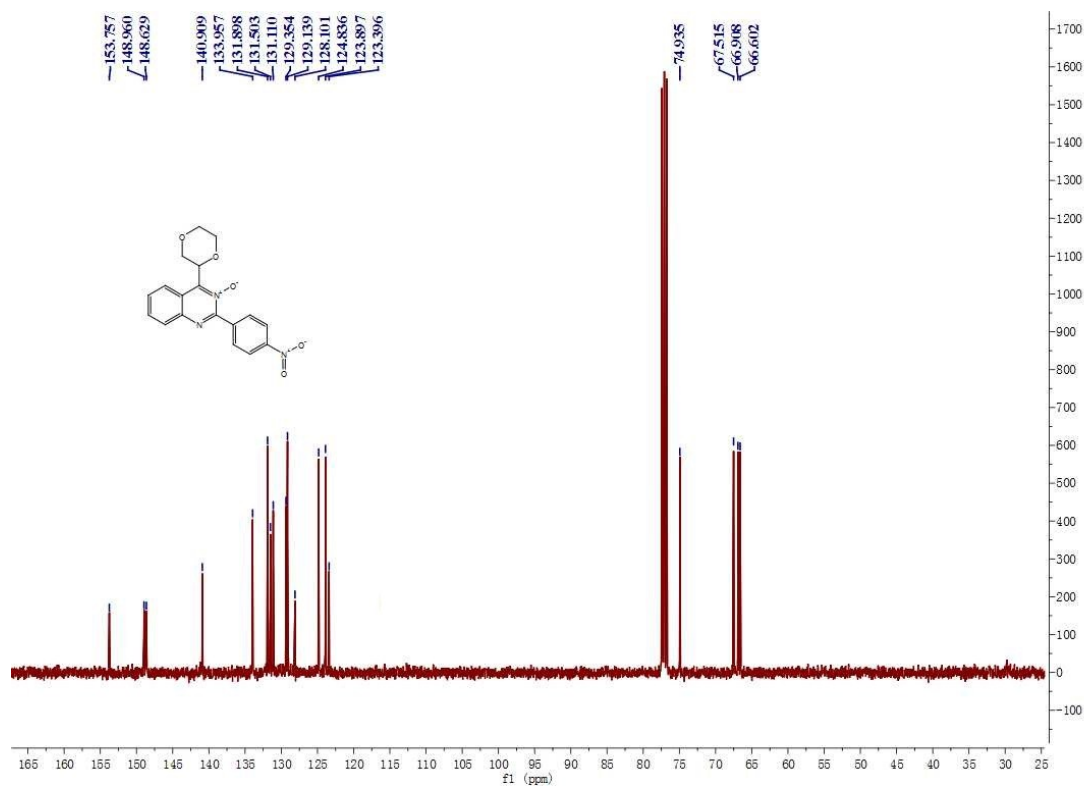

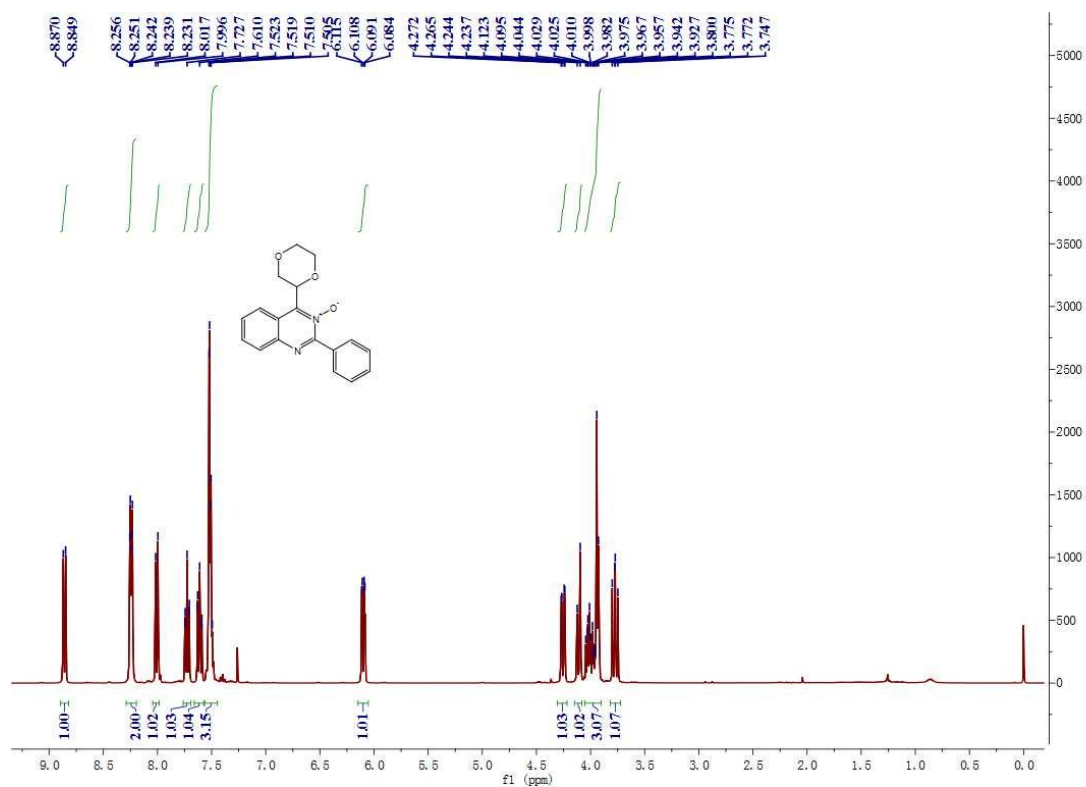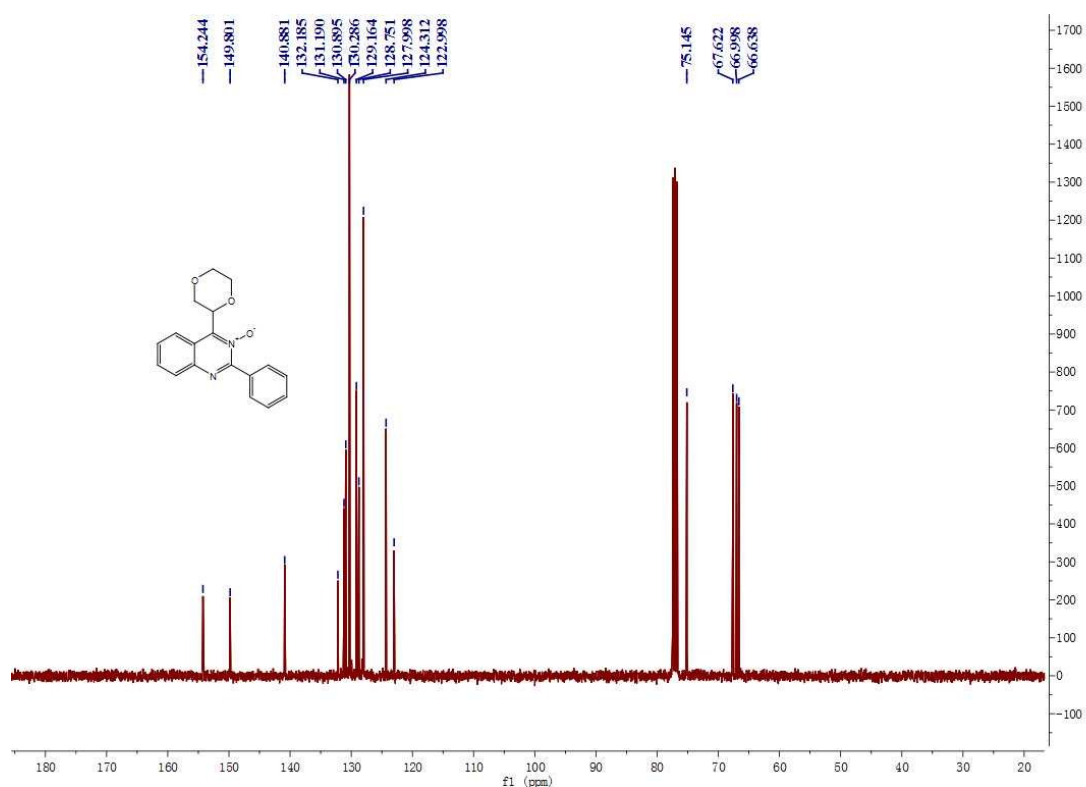

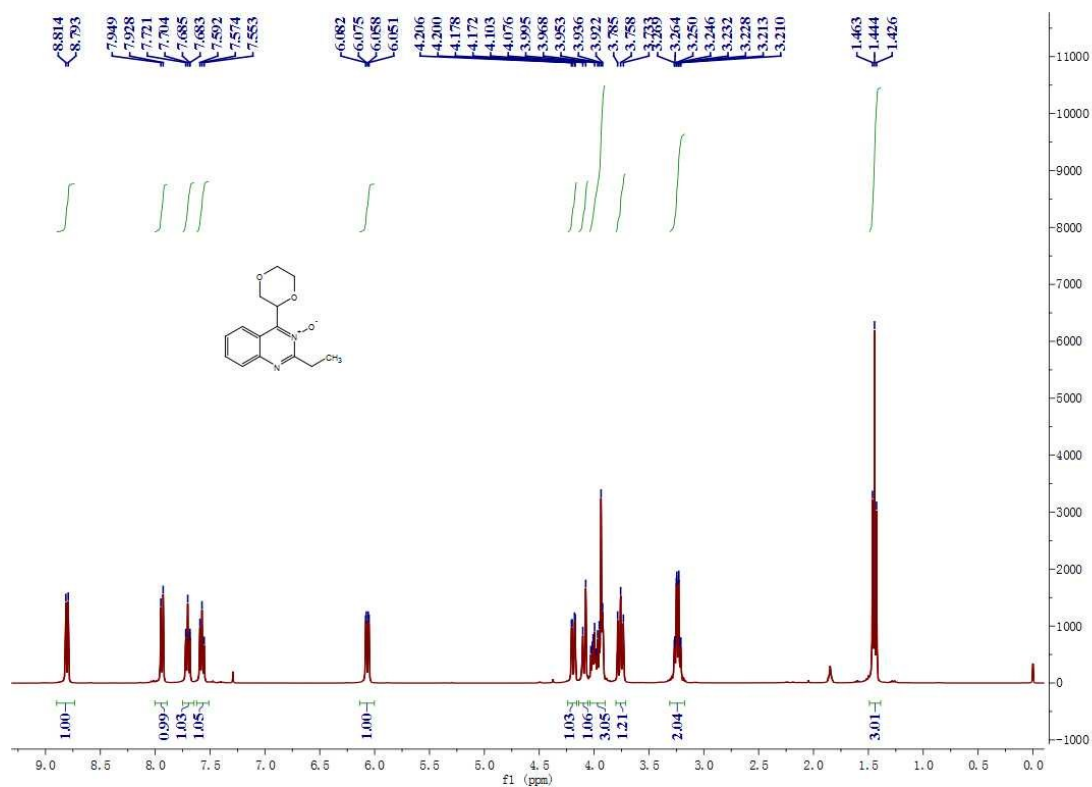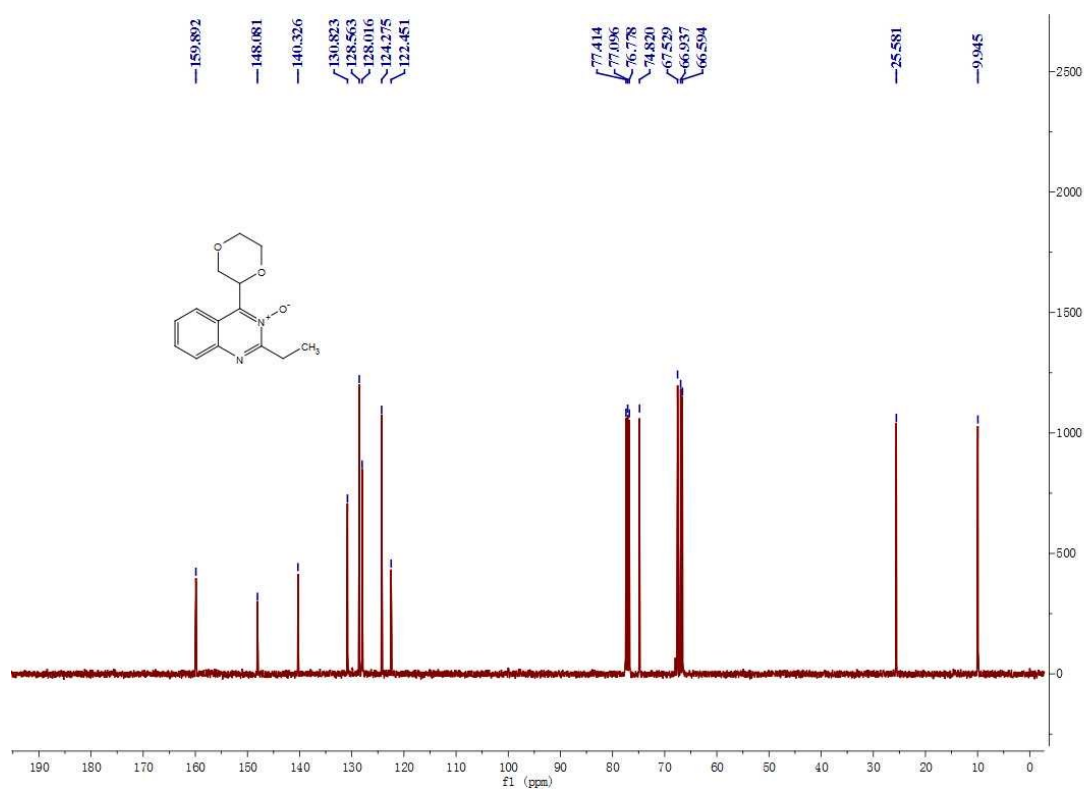

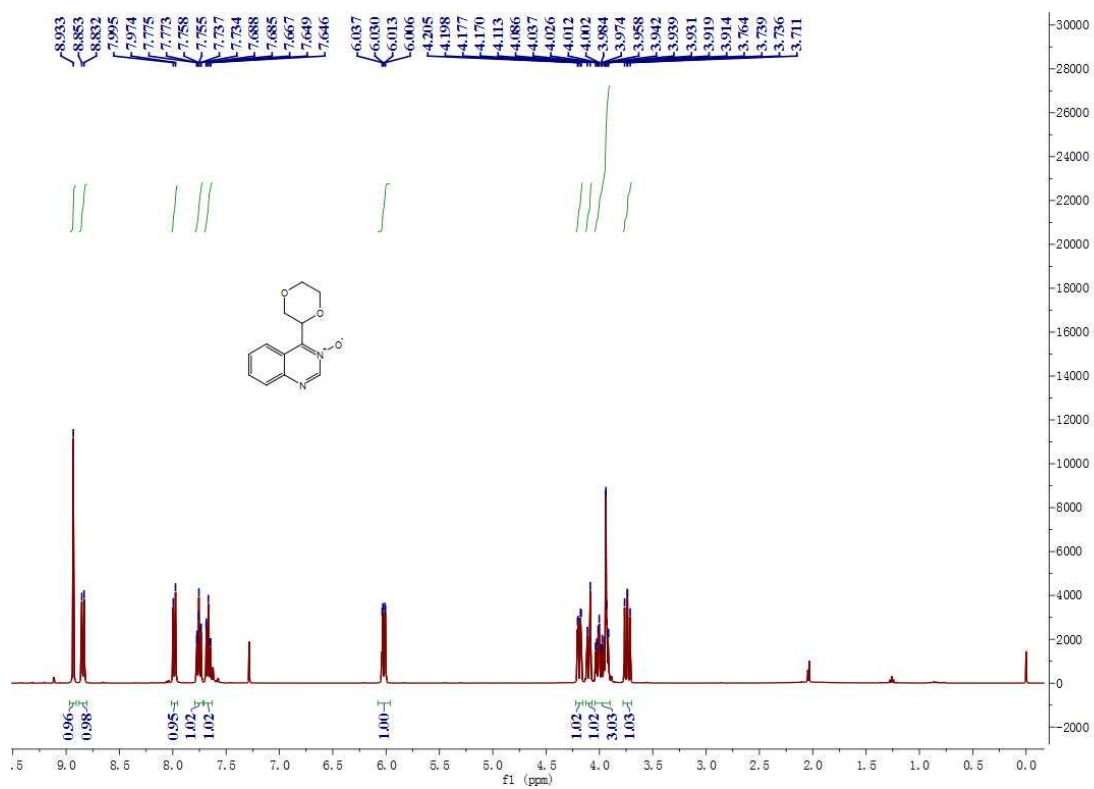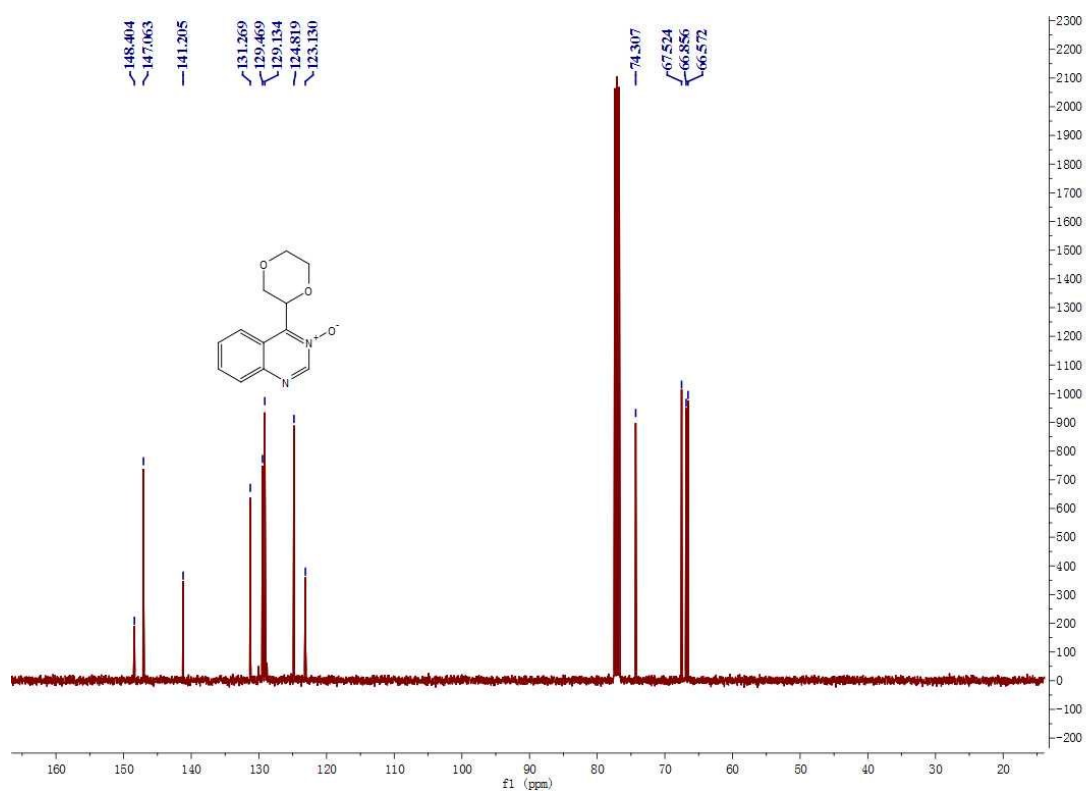

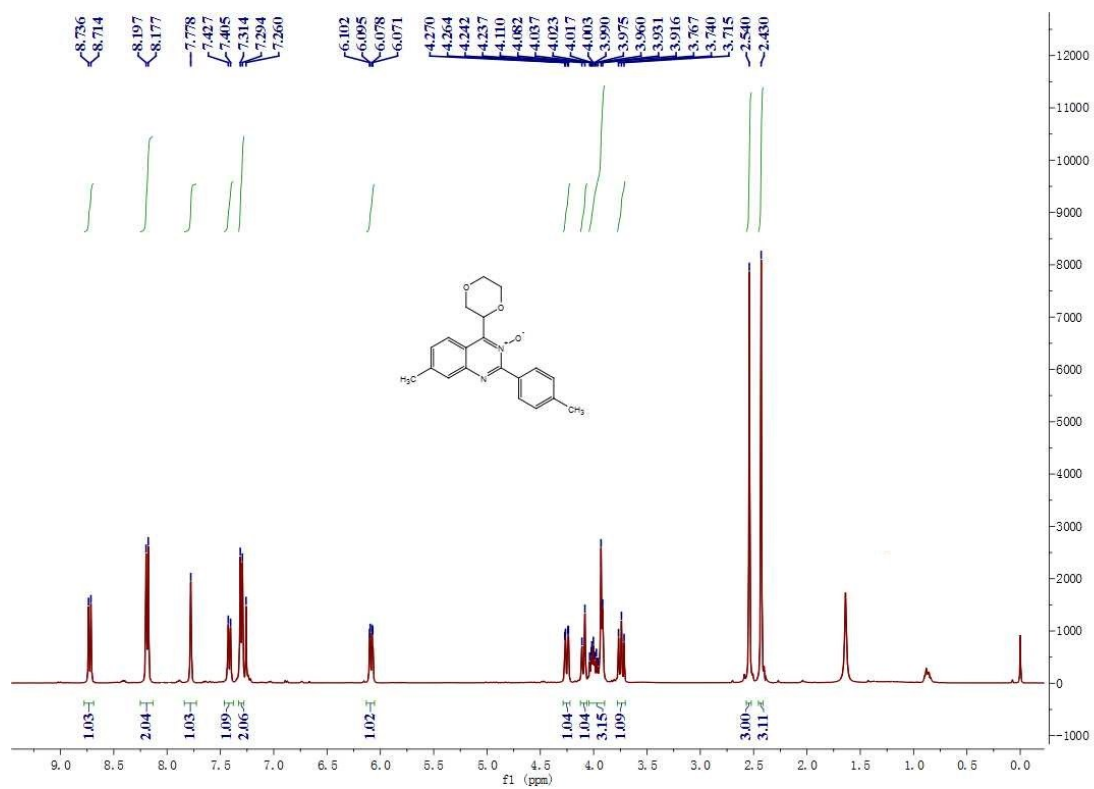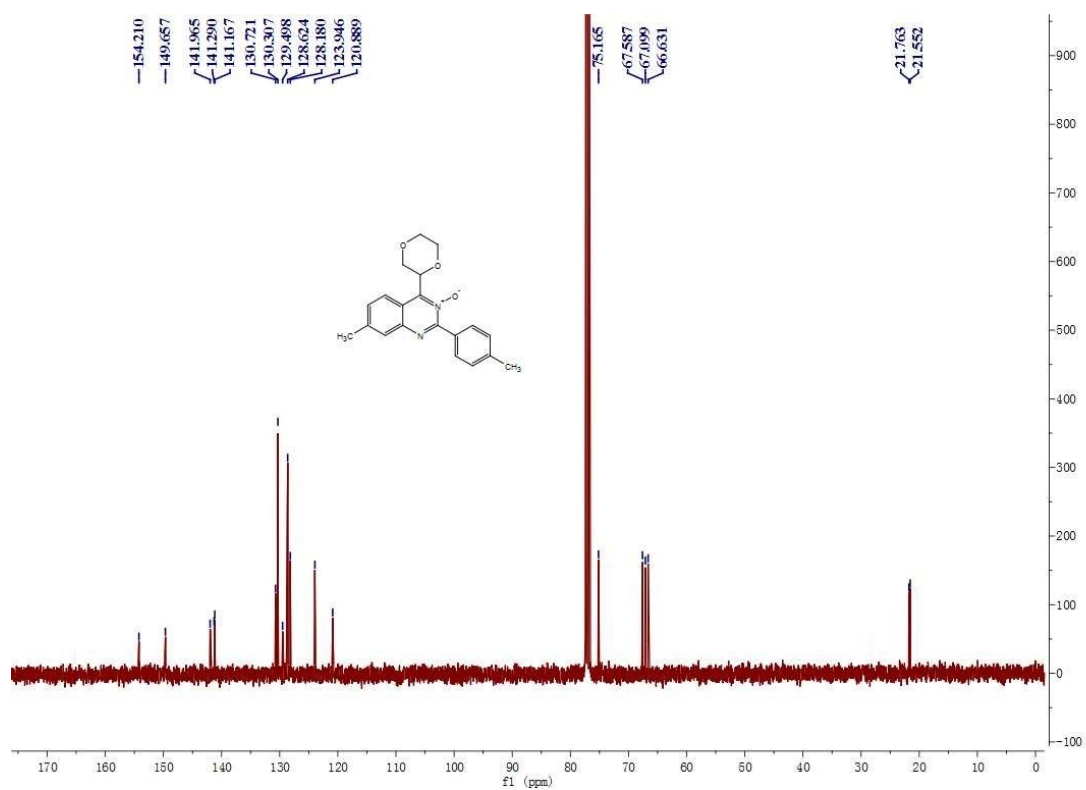

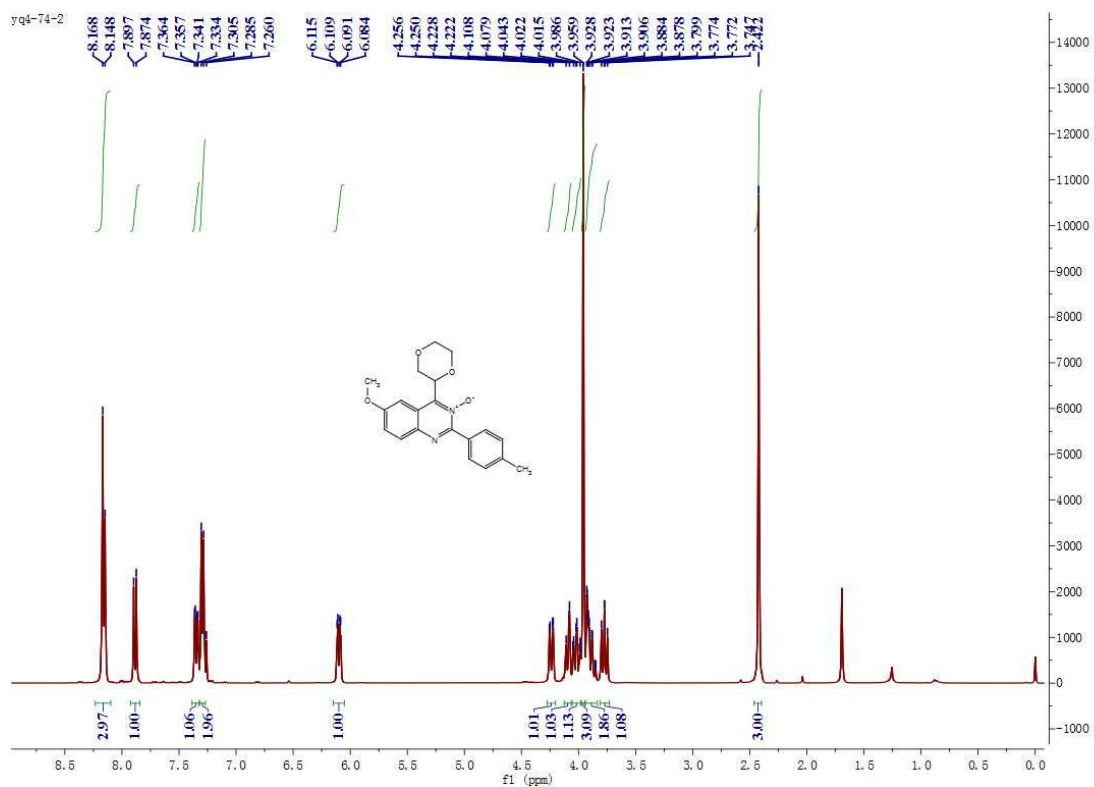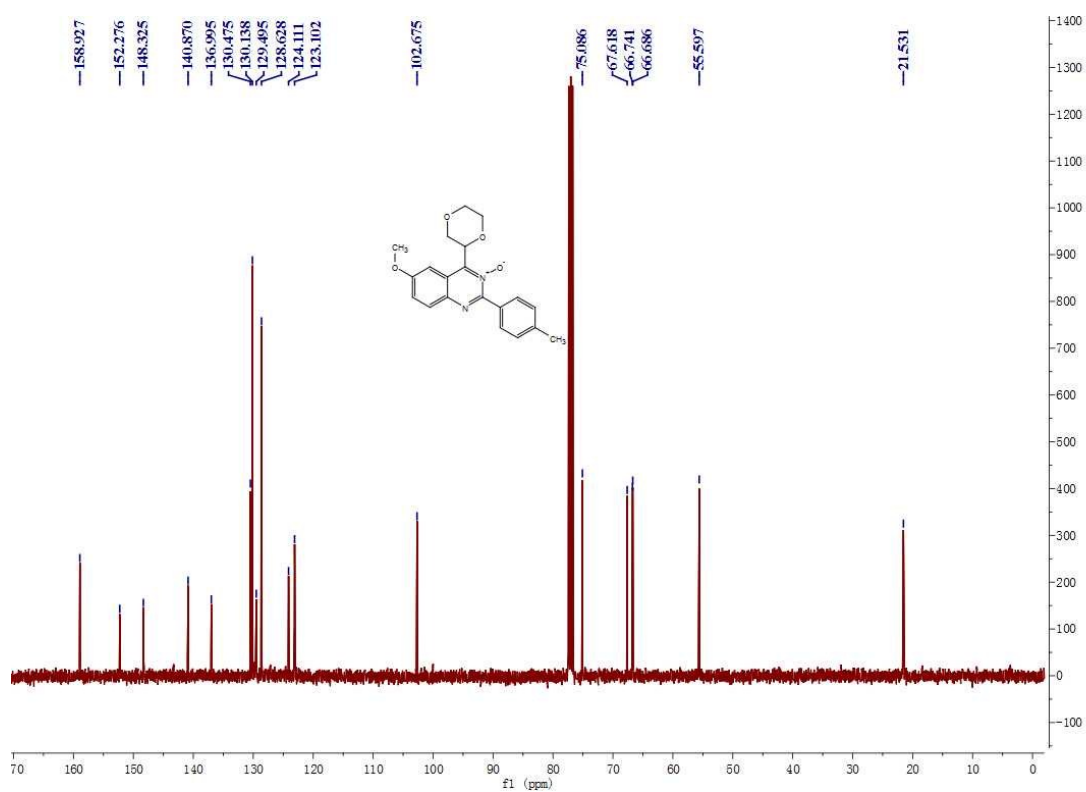

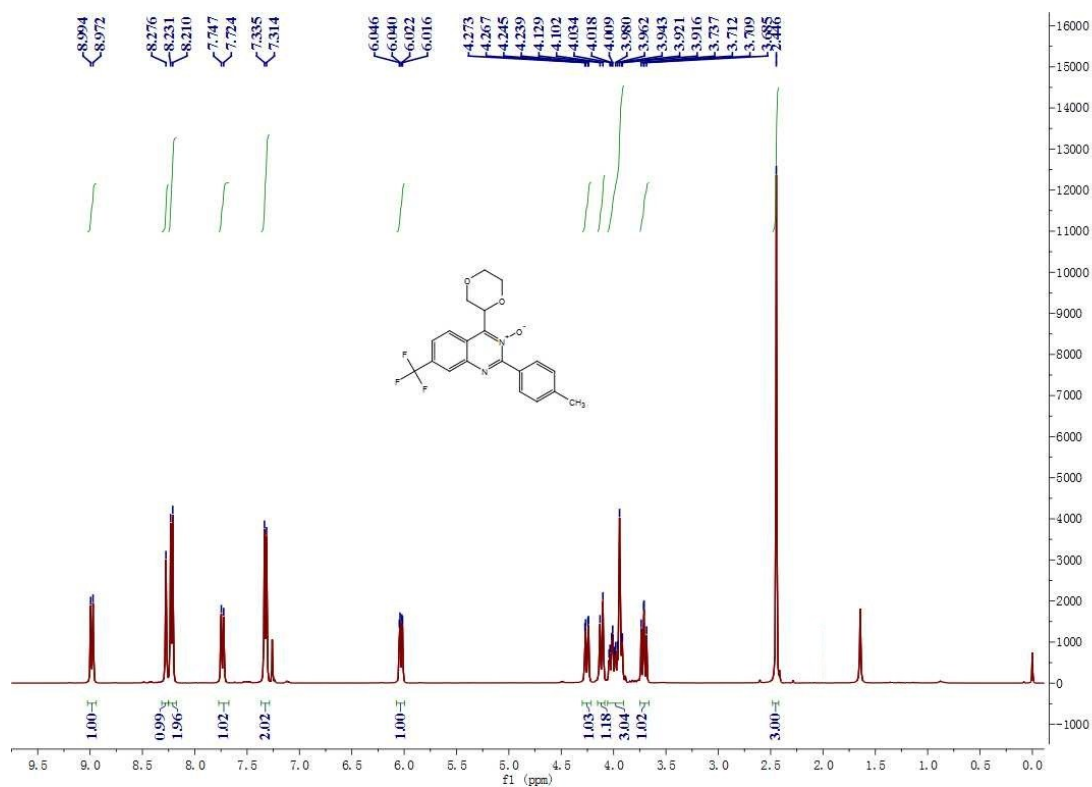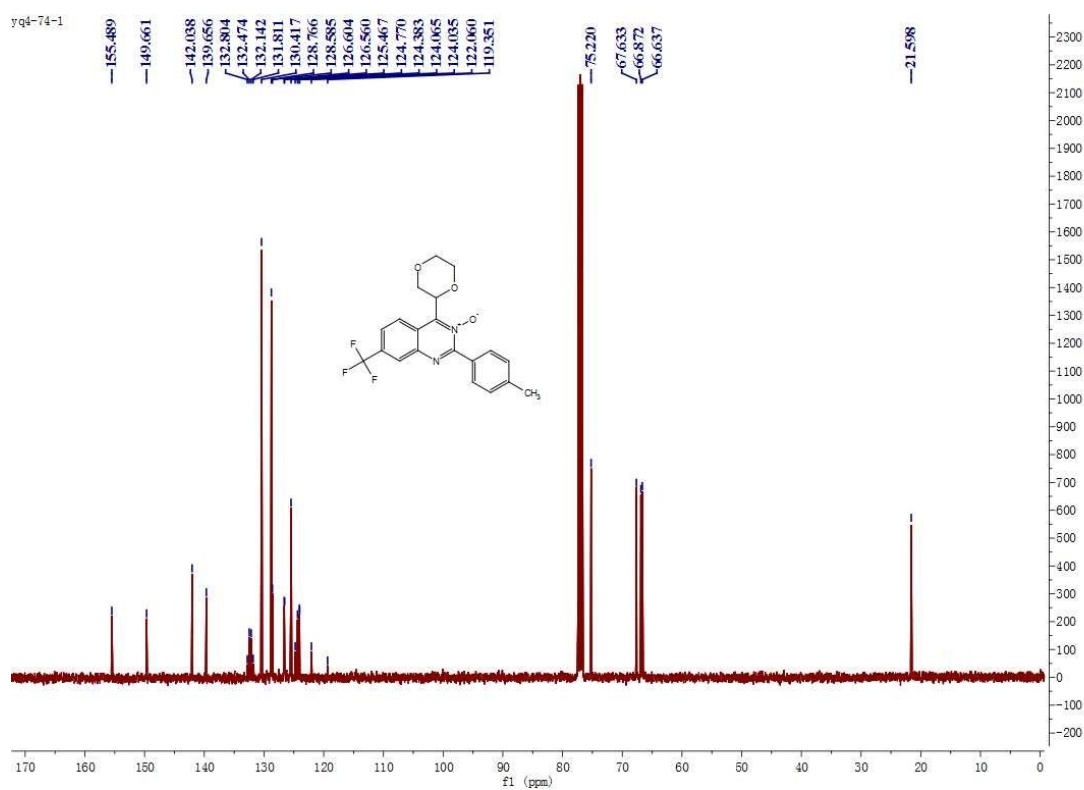

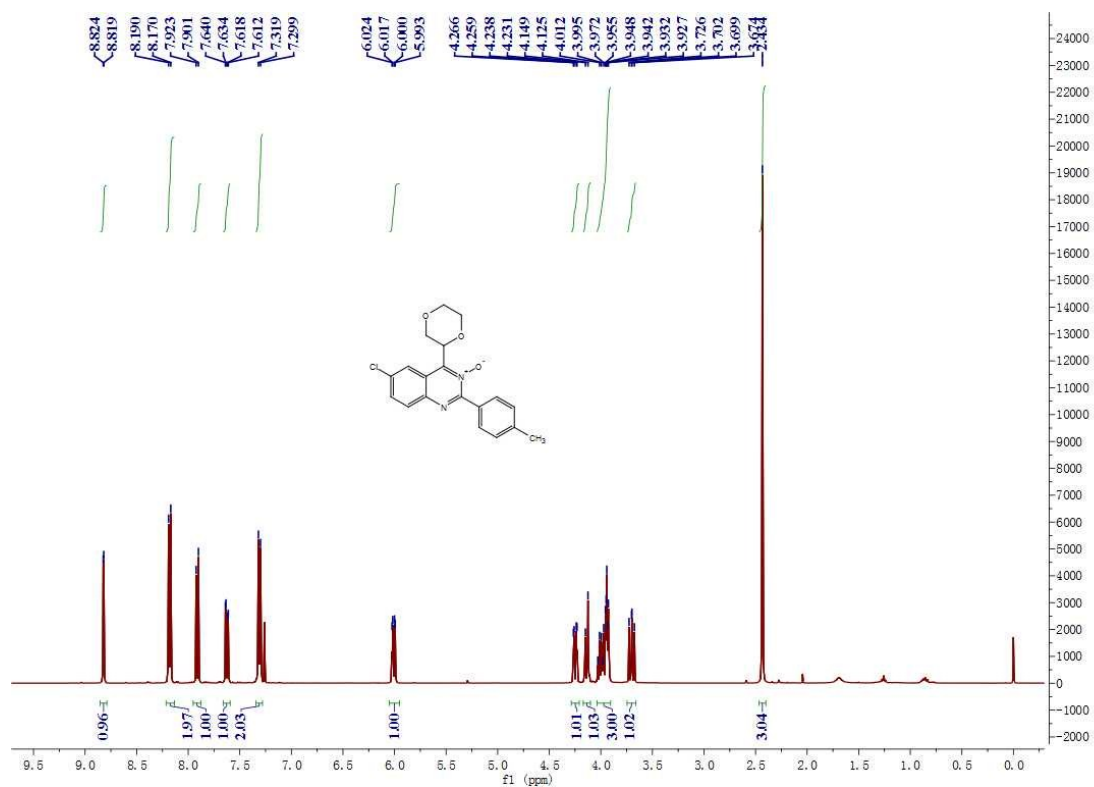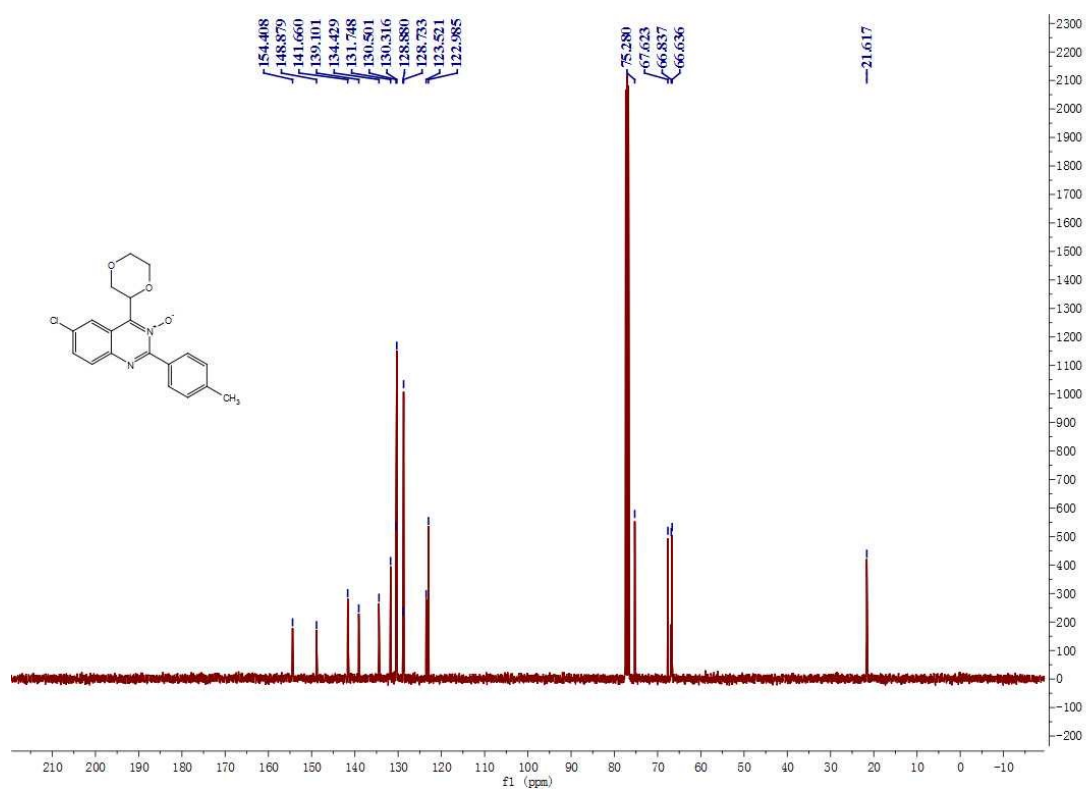

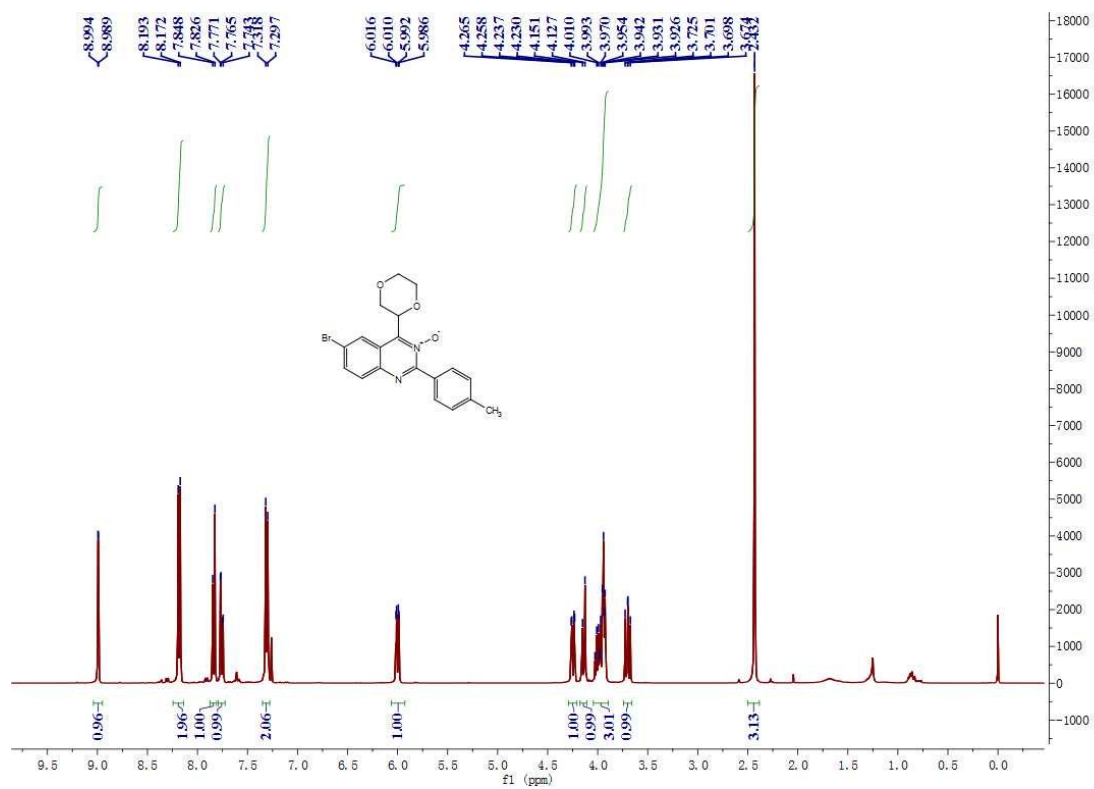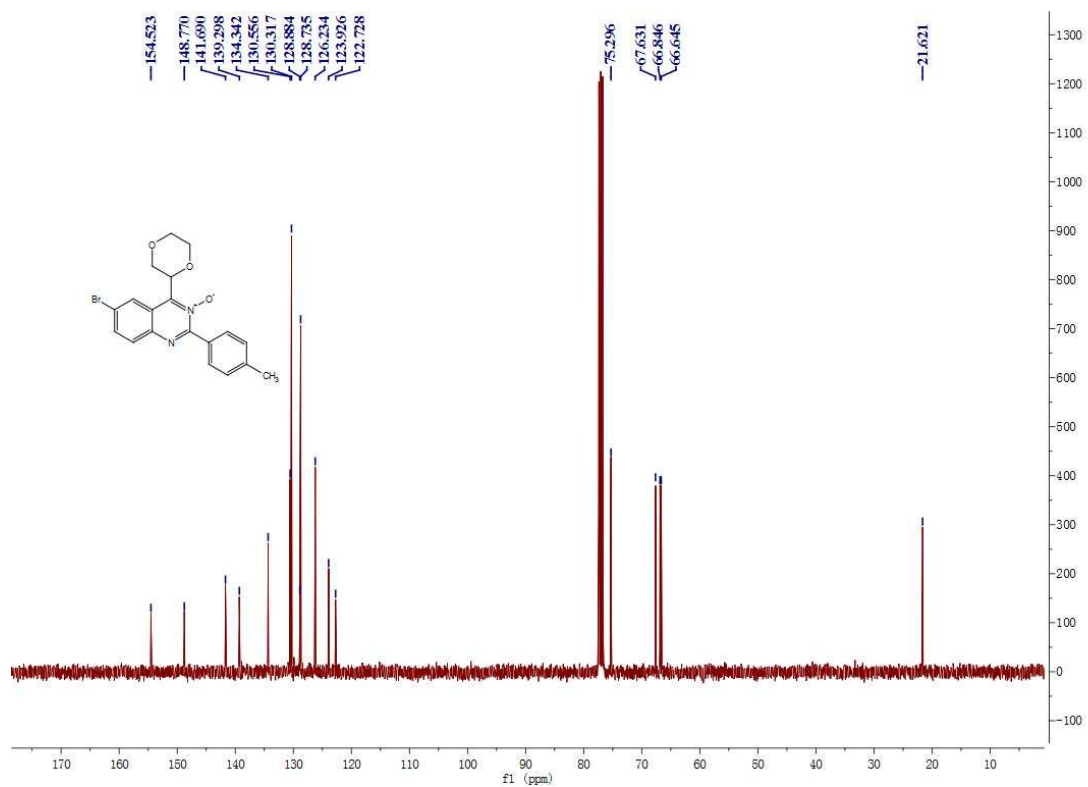

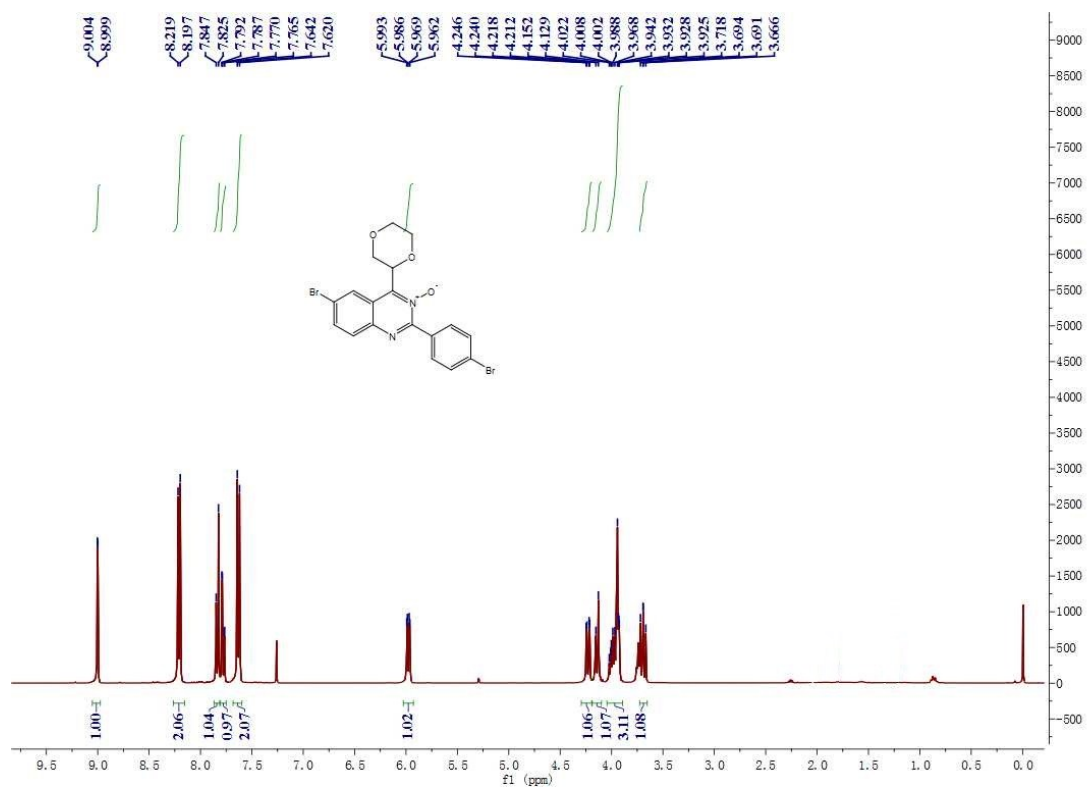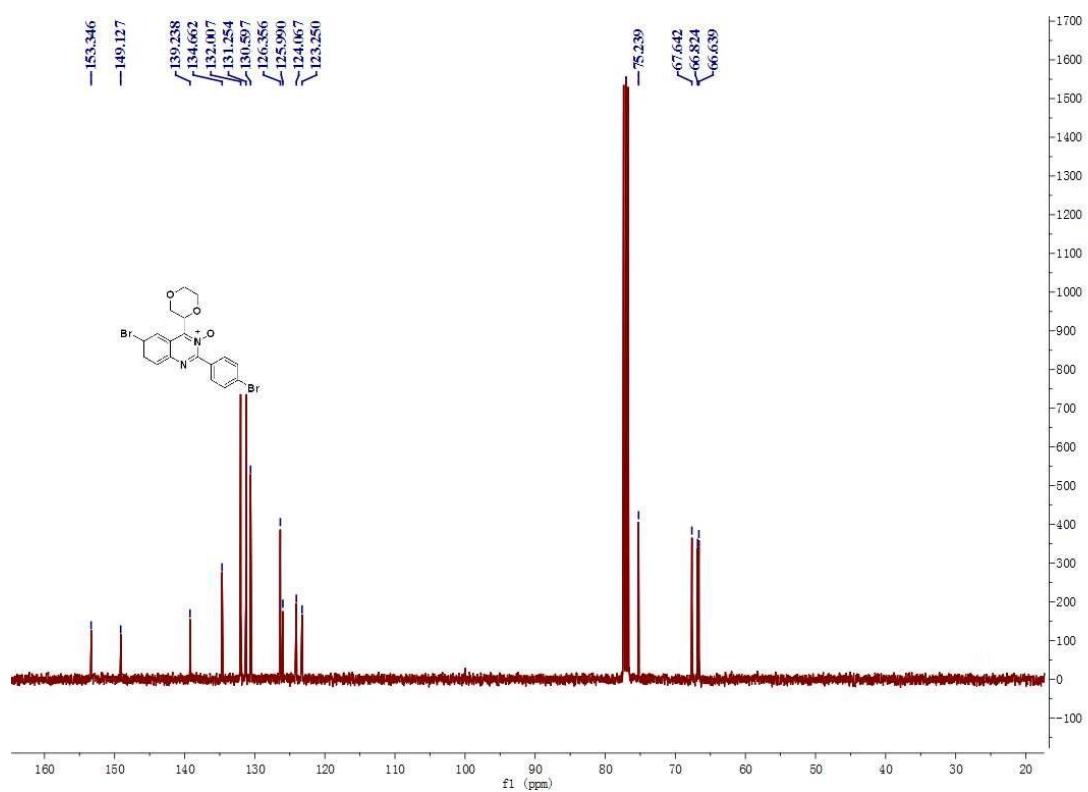

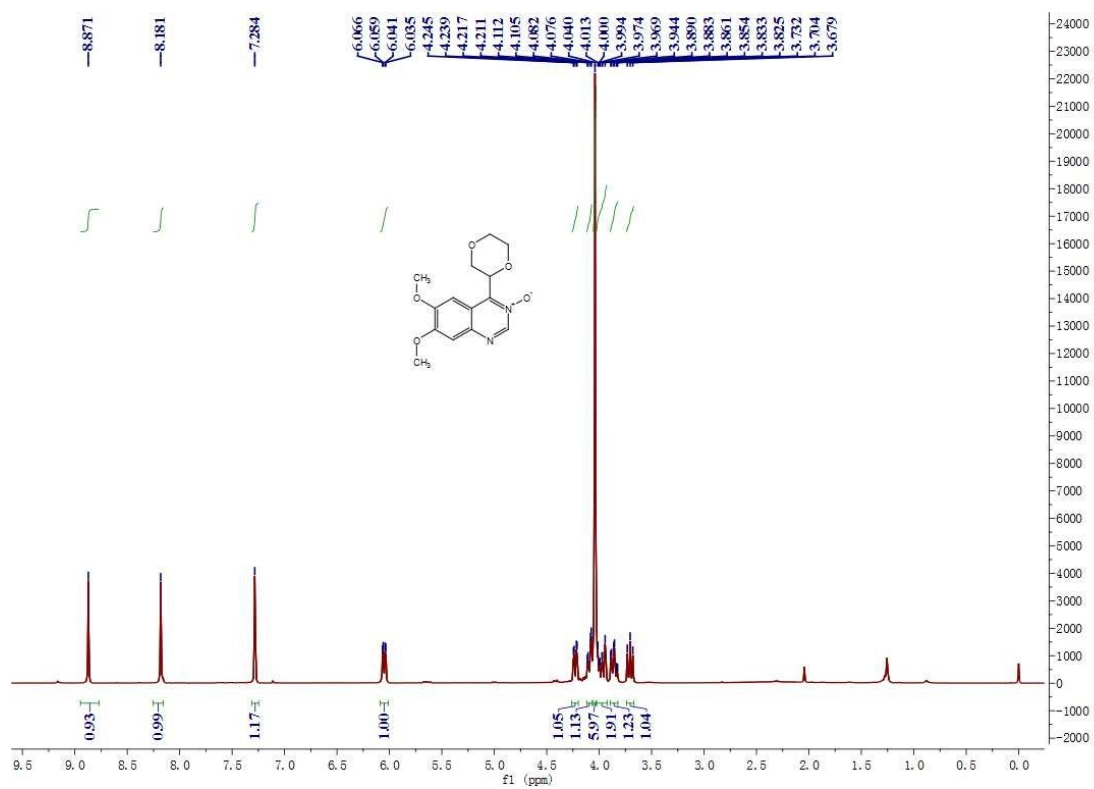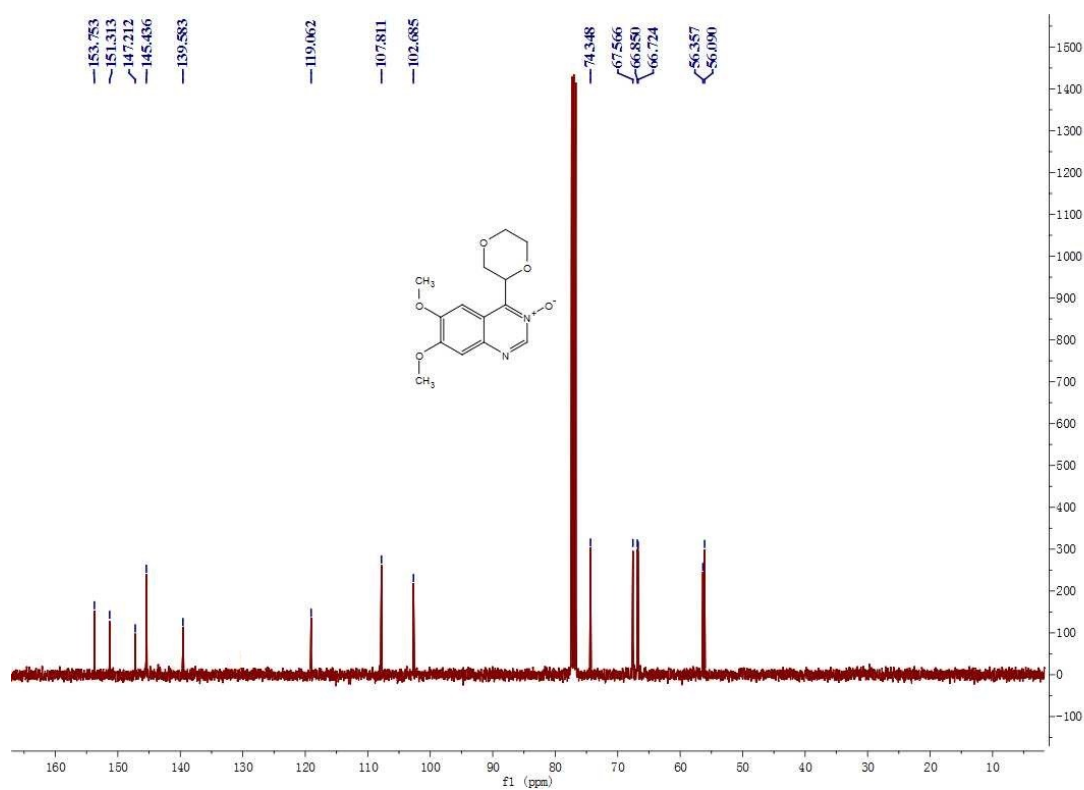

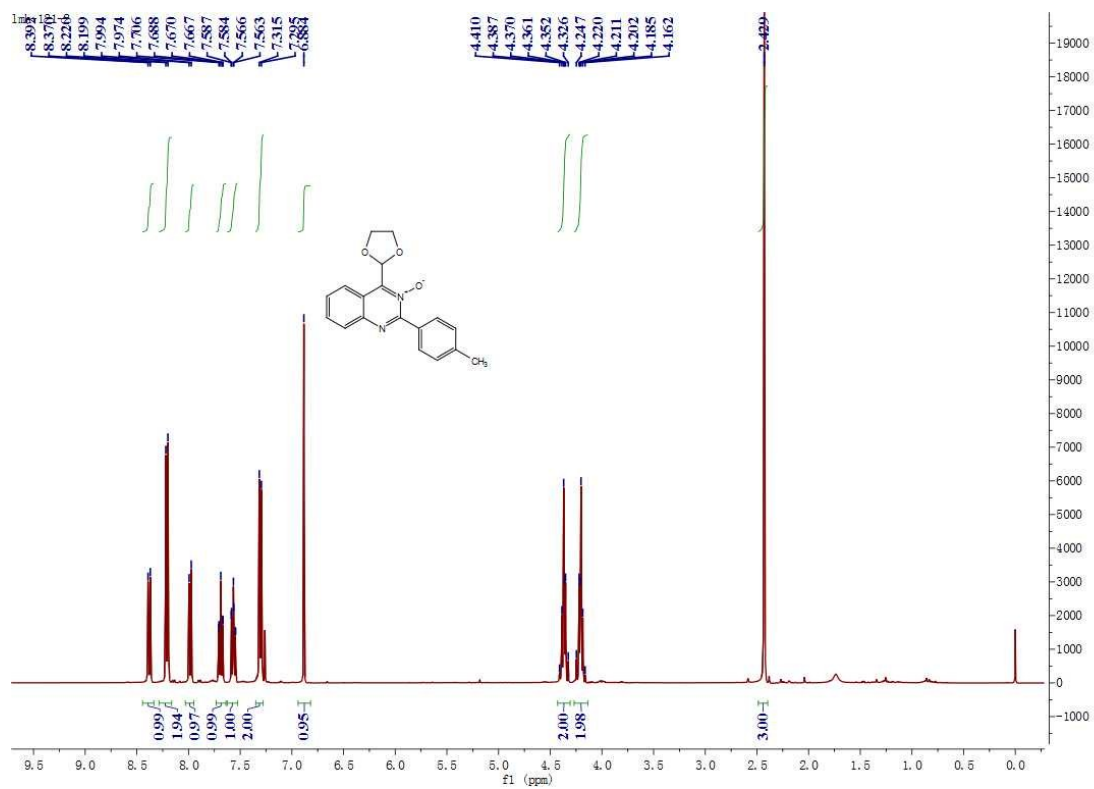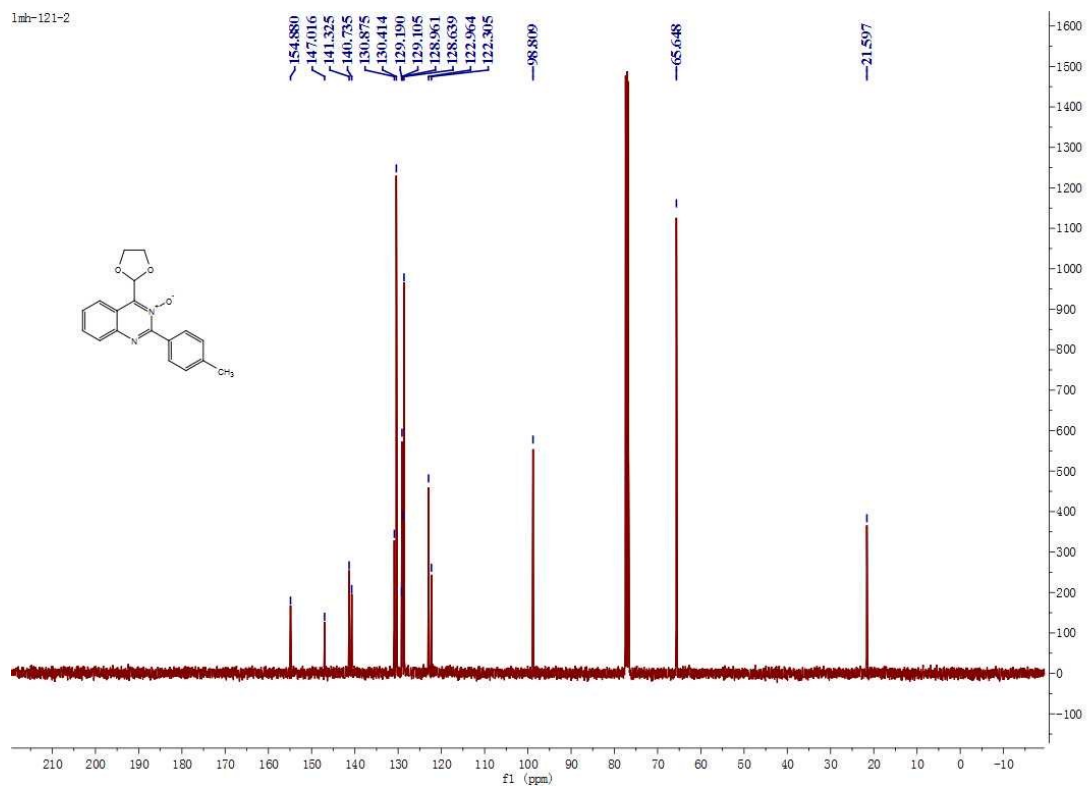

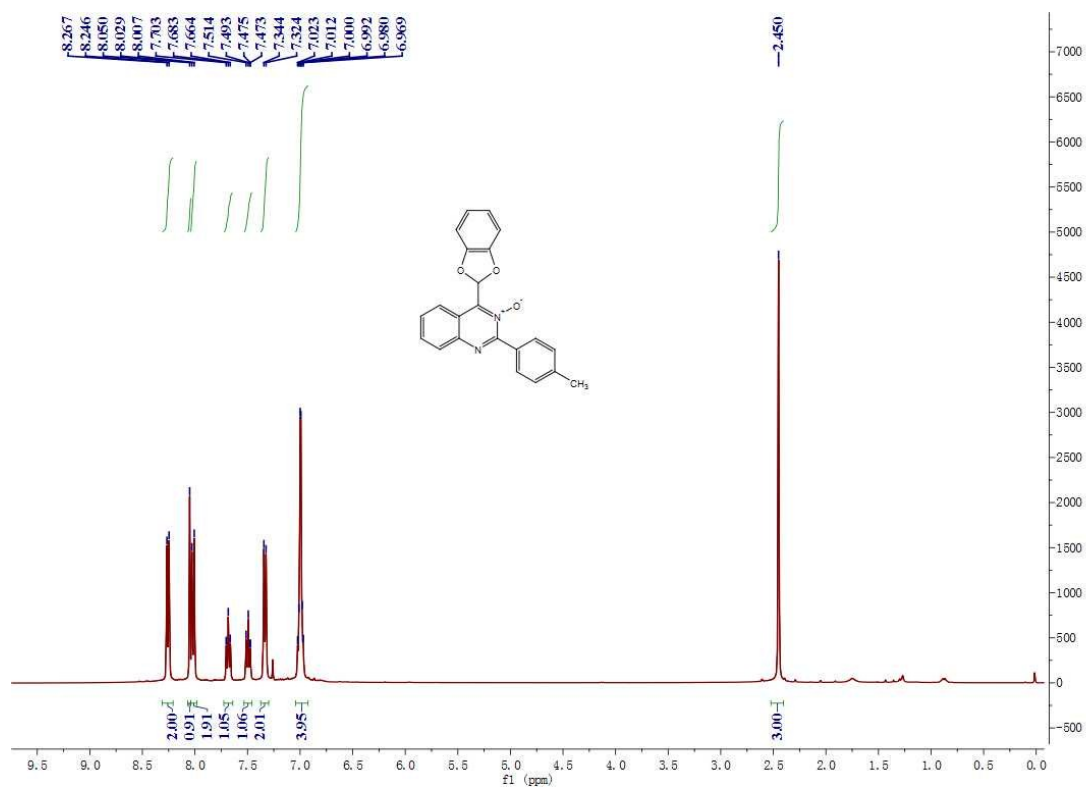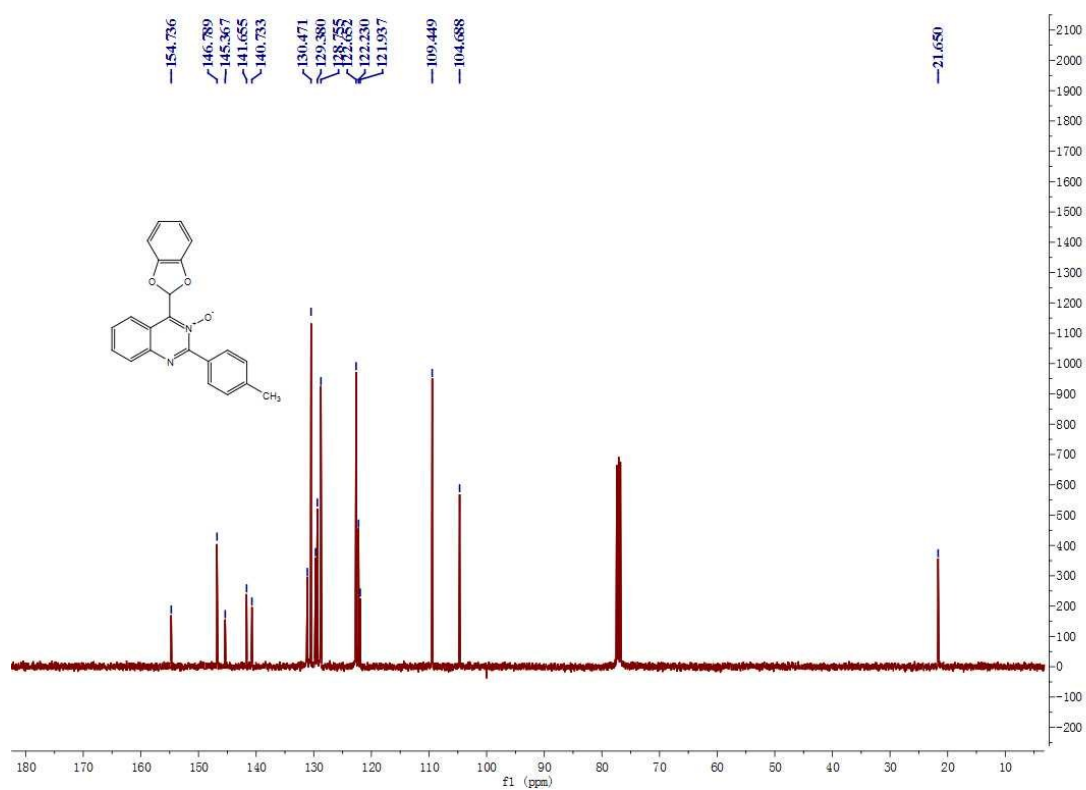

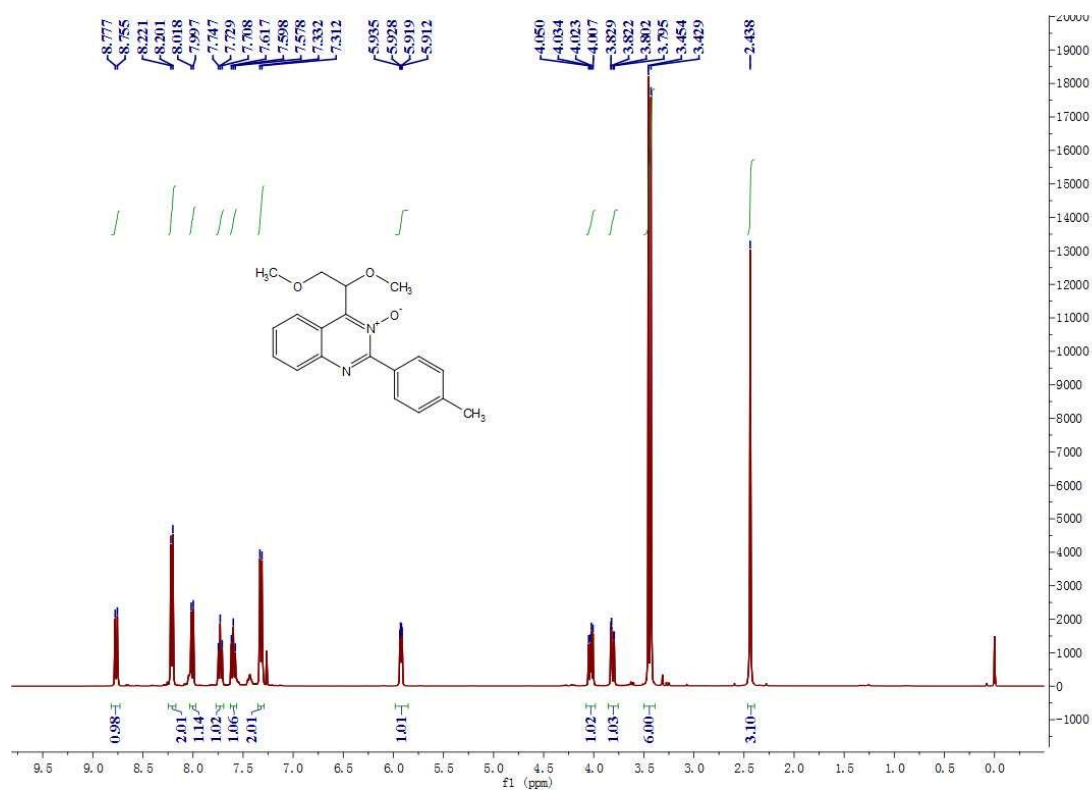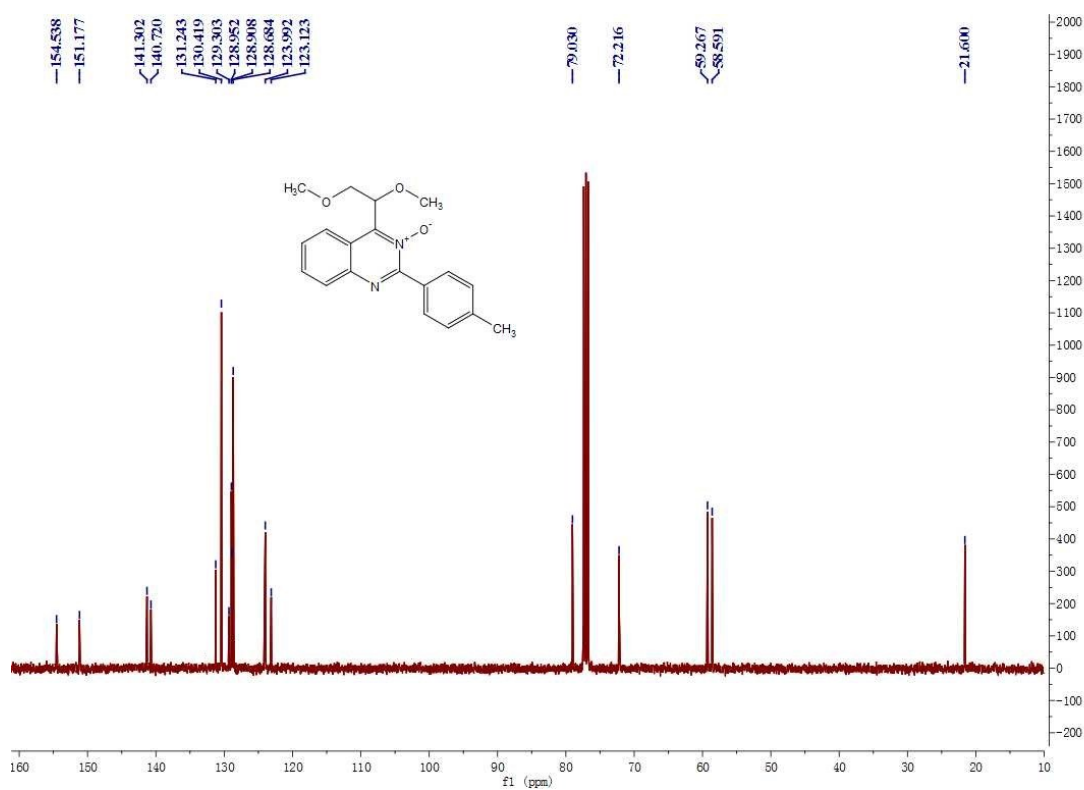

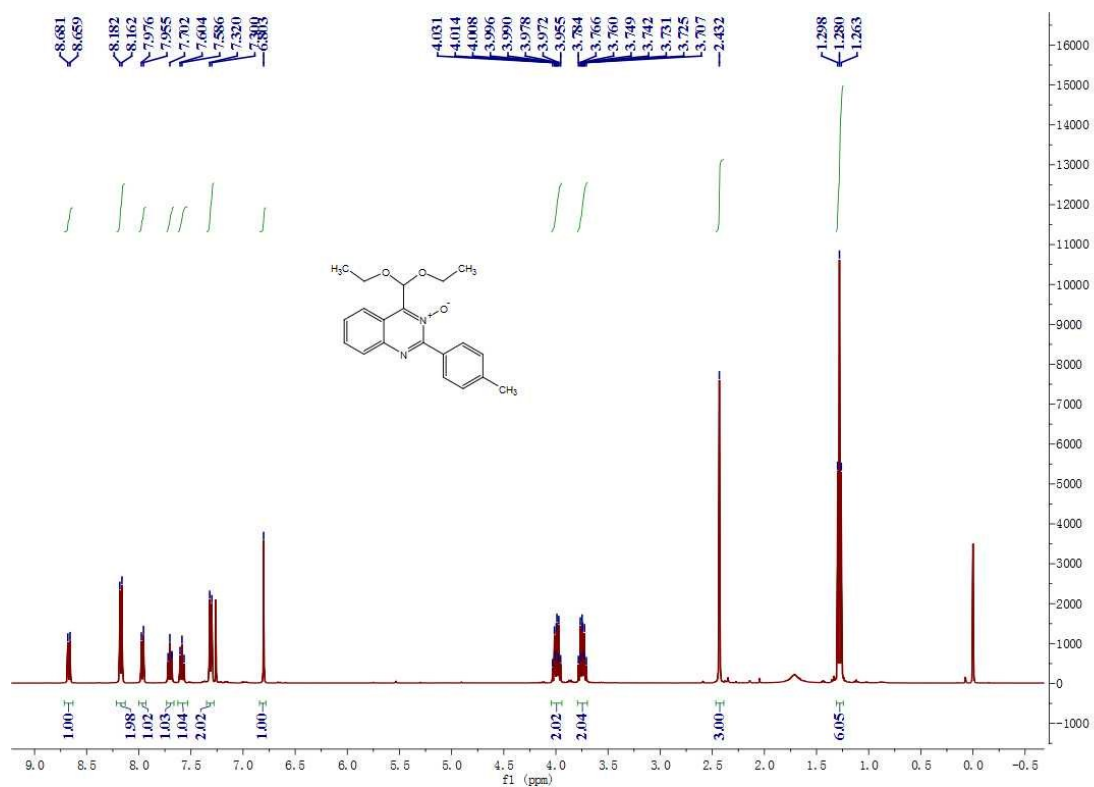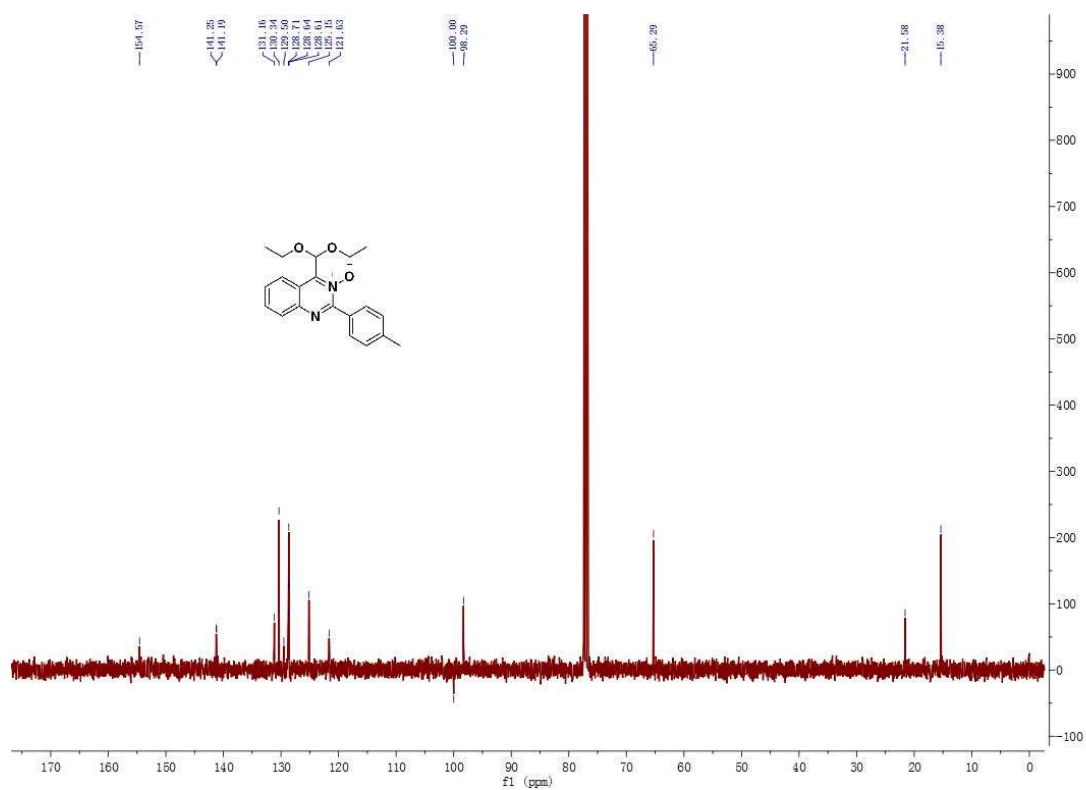

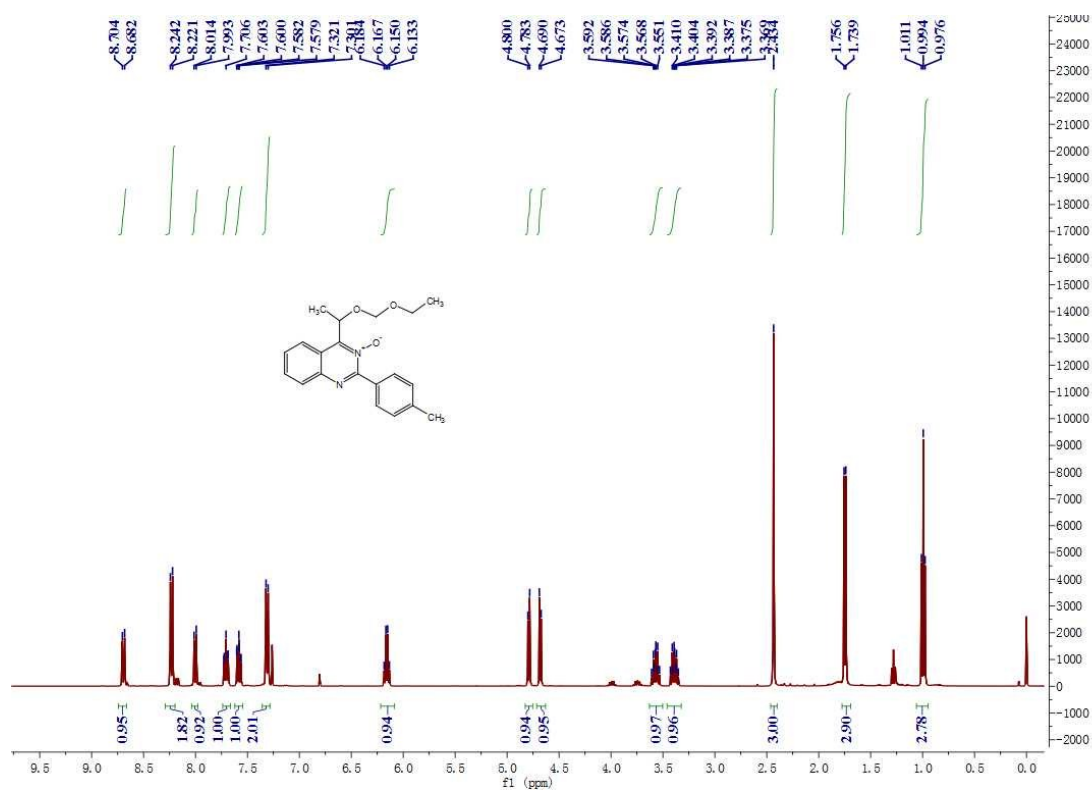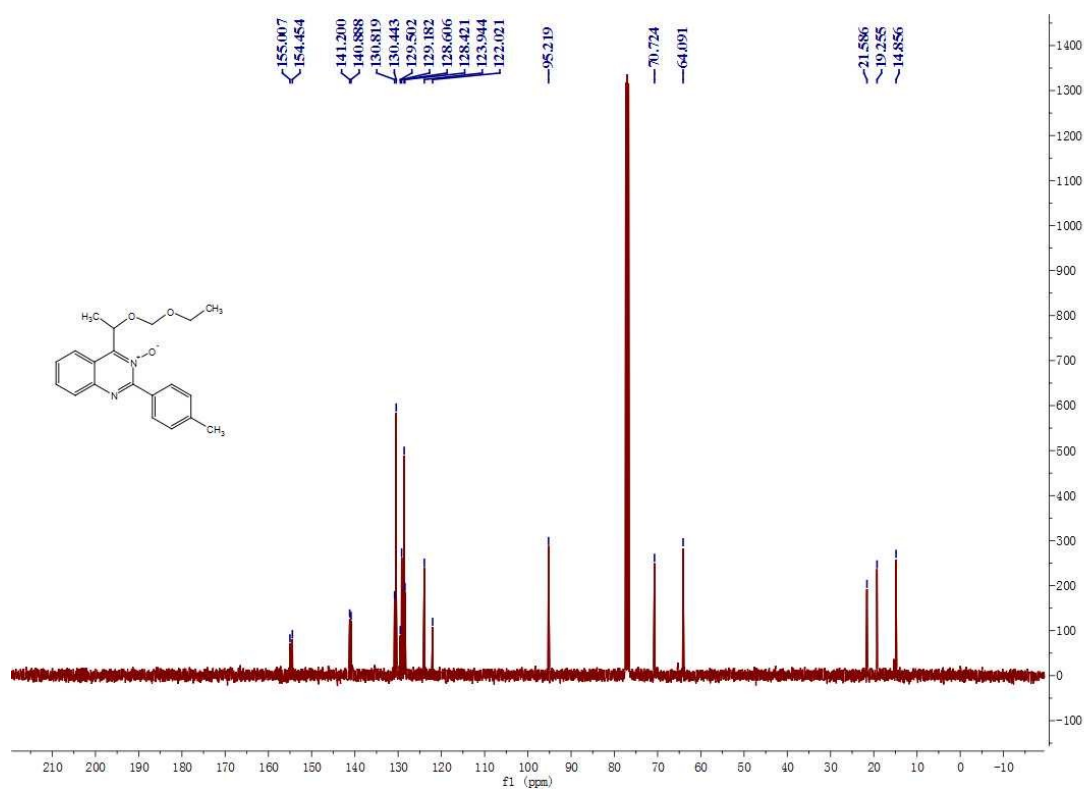

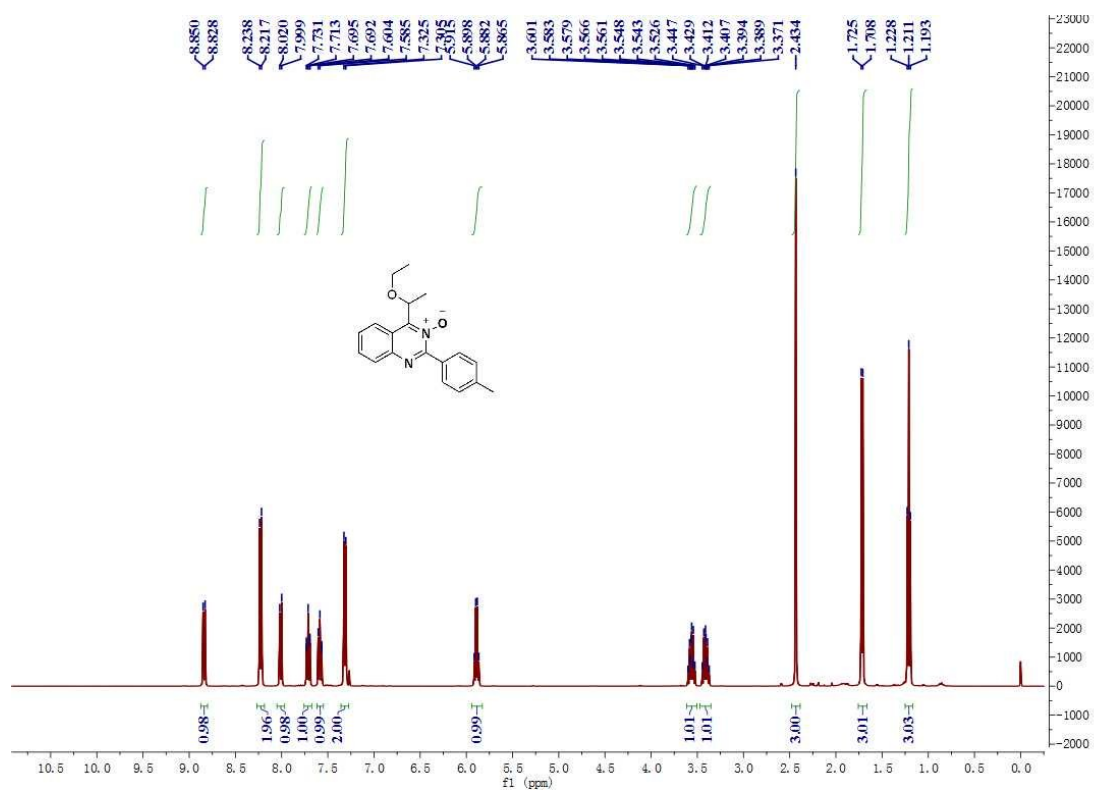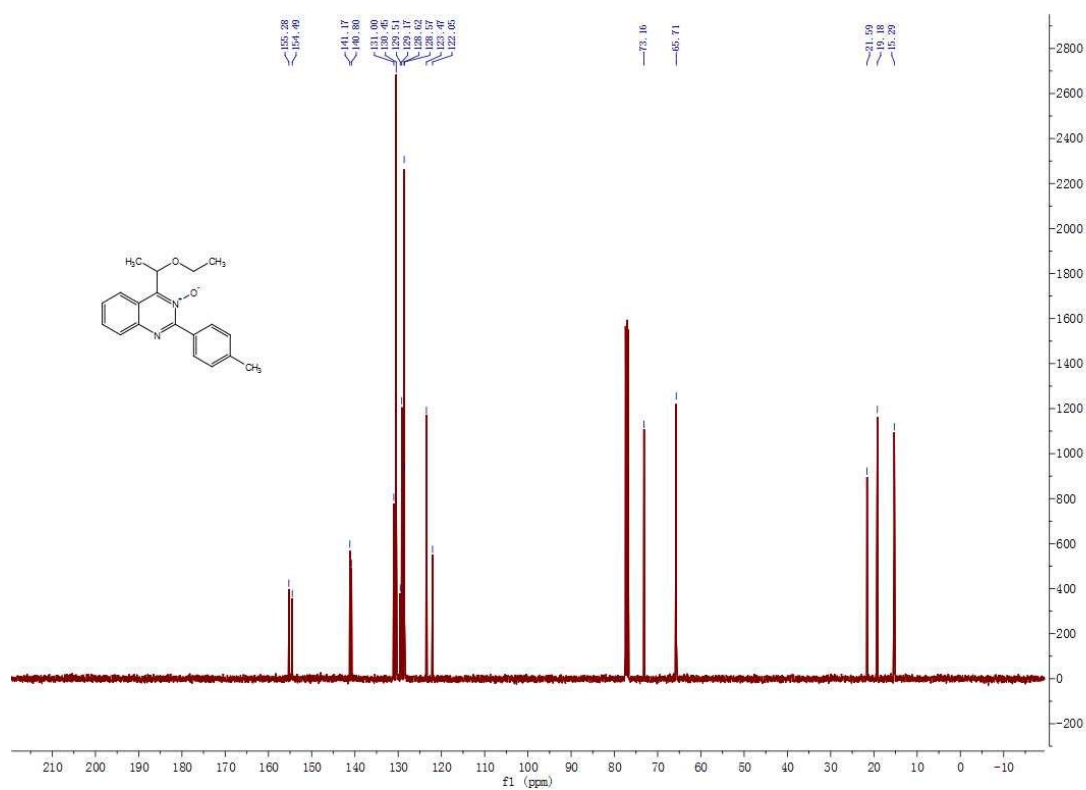

$^1\text{H}$  of spectra of benzoic acid concomitancy with **3q**.

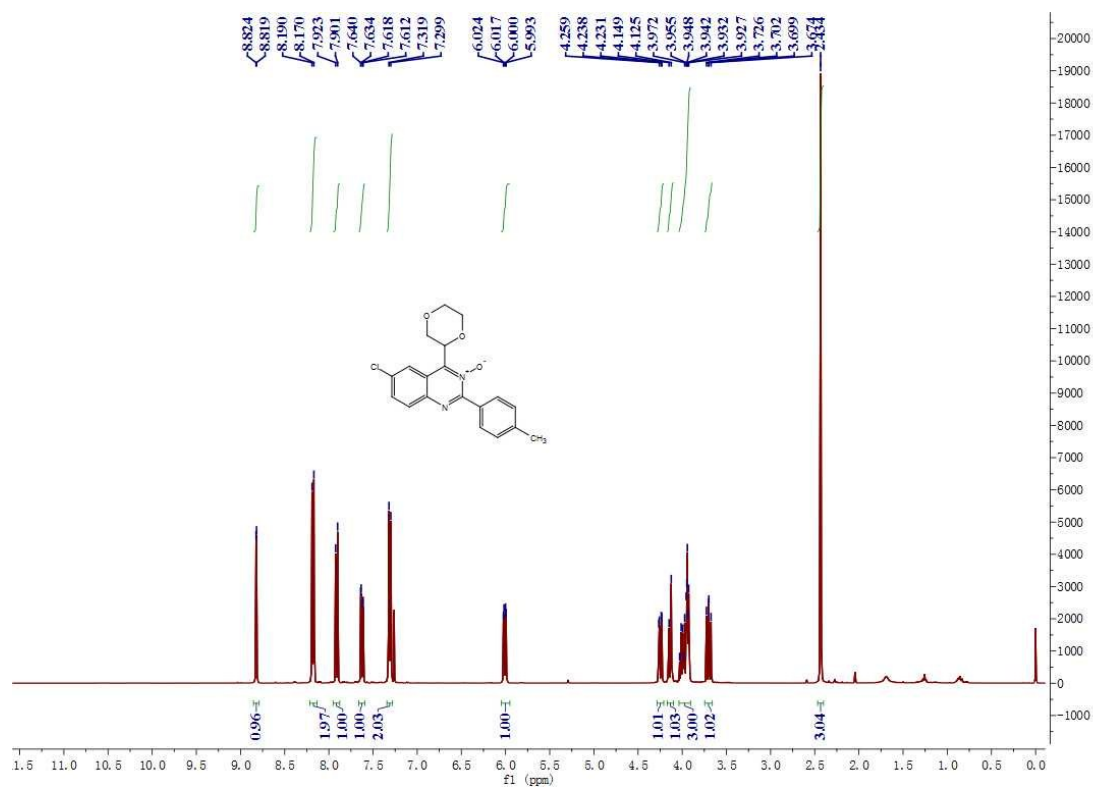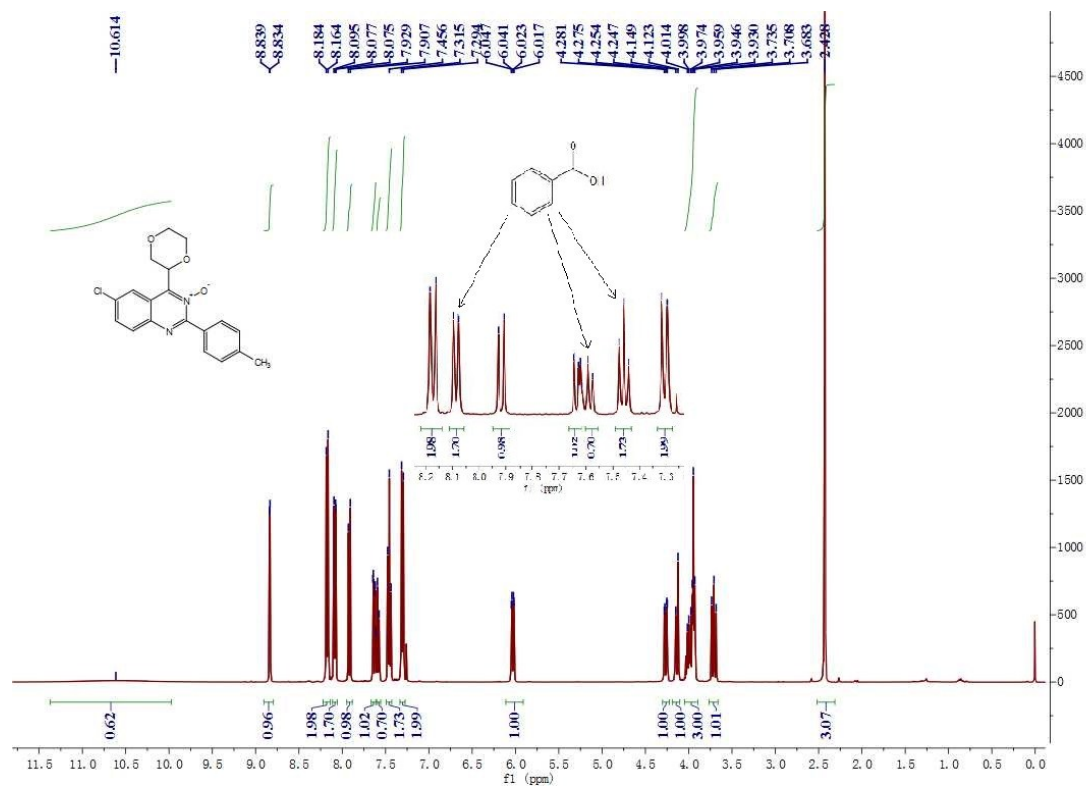

Supplement: c8ob01429a1.pdf [file c8ob01429a1.pdf]
